# Supplementary material for: An N,P-disubstituted-2-aminophosphaalkene and lithium and potassium complexes of the deprotonated “phosphaamidinate” anion
Source: Royal Society of Chemistry journal article supplement (doi:10.1039/b408994d), 2004-01-01
Supplement: b408994d.pdf [file b408994d.pdf]

# An N,P-disubstituted-2-aminophosphaalkene and lithium and potassium complexes of the deprotonated “phosphaamidinate” anion

René T. Boéré,<sup>\*a</sup> Marcus L. Cole,<sup>b</sup> Peter C. Junk,<sup>b</sup> Jason D. Masuda<sup>a</sup> and Gotthelf Wolmershäuser<sup>c</sup>

<sup>a</sup> Department of Chemistry and Biochemistry, University of Lethbridge, Lethbridge, Alberta, Canada, T1K 3M4.

E-mail: boere@uleth.ca

<sup>b</sup> School of Chemistry, Monash University, Victoria 3800, Australia

<sup>c</sup> Fachbereich Chemie der Universität Kaiserslautern, Erwin-Schrödinger-Straße, D-67663 Kaiserslautern, Germany.

## Supporting Information

### Experimental

#### General Procedures

All manipulations were performed using conventional Schlenk or glovebox techniques under an atmosphere of high purity dinitrogen in flame-dried glassware. Molybdenum carbonyl (Strem) was used as received. *n*-Butyl lithium (1.6 M in hexane) and potassium bis(trimethylsilyl)amide (0.5M in toluene) were purchased from Aldrich. Solvents were reagent grade, or better, and used as received (methanol, ethanol, hexanes), distilled over LiAlH<sub>4</sub> (*n*-heptane) or distilled over sodium (xylenes). Tetrahydrofuran (THF) and hexane were dried over sodium, freshly distilled from sodium benzophenone ketyl and freeze-thaw degassed prior to use. Infrared spectra were recorded on Bomem MB-100 or Nicolet Avatar 360 and Nexus spectrometers as KBr pellets, as Nujol mulls using sodium chloride plates or in a 0.1 mm NaCl solution cavity cell. <sup>1</sup>H, <sup>13</sup>C and <sup>31</sup>P NMR spectra were recorded on a Bruker AC250/Tecmag Macspect spectrometer operating at 250.13, 101.26 and 62.90 MHz, respectively, a Bruker DPX 300 spectrometer at 300.13, and 75.46 MHz or a Varian Inova 500 operating at 499.3 (<sup>1</sup>H), 202.1 (<sup>31</sup>P), 125.6 (<sup>13</sup>C), and 50.6 (<sup>15</sup>N) MHz. <sup>1</sup>H NMR signals were referenced to tetramethylsilane or THF, <sup>13</sup>C to CDCl<sub>3</sub> or THF <sup>13</sup>P to an external H<sub>3</sub>PO<sub>4</sub> sample and <sup>15</sup>N NMR to an external CH<sub>3</sub>NO<sub>2</sub> sample.

Mass spectra were undertaken in the Department of Chemistry, University of Alberta. Melting points were determined in sealed glass capillaries under dinitrogen and are uncorrected. Elemental analyses were run by MHW Laboratories, Phoenix, Az or at the University of Otago, P.O. Box 56, Dunedin, New Zealand..

DippN=C(*p*CH<sub>3</sub>C<sub>6</sub>H<sub>4</sub>)Cl was prepared as per reference 8a, and DippPH<sub>2</sub> as per reference 9.

#### Preparation of 1,3-bis(2,6-diisopropylphenyl)-2-ptolyl-1-phosphapropene 2

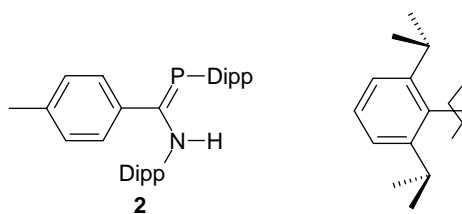

Dipp = 2,6-diisopropylphenyl

38 mL of dry xylenes were freeze-thaw degassed (5×) in a 250 mL side arm flask. Then 5.00 g (15.9 mmol) of DippN=C(*p*CH<sub>3</sub>C<sub>6</sub>H<sub>4</sub>)Cl and 3.10 g (15.9 mmol) DippPH<sub>2</sub> were added. The flask was fitted with a reflux condenser and heated in a 200-215°C oil bath. The reaction was monitored by <sup>1</sup>H NMR over four days, after which time all starting materials were consumed. Xylenes were removed under high vacuum. The remaining orange solid was dissolved in a minimum of hot 99% ethanol and cooled to –30°C. After four days bright yellow crystals were filtered off and the filtrate was reduced to half the original volume. After harvesting a second crop, a total of 3.06g (6.49 mmol) of crystals were obtained. Analytical crystals were obtained by recrystallization from hot methanol. Yield: 41% Melting Point: 115-119°C.

Elemental Analysis: Calc. for C<sub>32</sub>H<sub>42</sub>NP: C, 81.49; H, 8.98; N, 2.97. Found: C, 81.57; H, 8.48; N, 3.02%.

<sup>1</sup>H NMR (major isomer, CDCl<sub>3</sub>): δ 0.81 (d, J(H-H) 6.7 Hz, 6H), 0.89 (d, J(H-H) 6.7 Hz, 6H), 1.26 (d, J(H-H) 6.7 Hz, 6H), 1.35 (d, J(H-H) 6.9 Hz, 6H), 2.22 (s, 3H), 3.00 (sept., J(H-H) 6.7 Hz, 2H), 3.84 (doublet of septets, J(H-H) 6.8 Hz, <sup>4</sup>J(P-H) 3.4 Hz, 2H), 6.23 (d, J(P-H) 2.4 Hz, 1H), 6.93-7.35 (mult., 10H).

$^{13}\text{C}$  NMR (major isomer,  $\text{CDCl}_3$ ):  $\delta$  21.12 (s, *p*- $\text{CH}_3$ - $\text{C}_6\text{H}_4$ ), 22.30 (s, amino-Dipp- $^i\text{Pr}$ - $\text{CH}_3$ ), 23.05 (s, phosphino-Dipp- $^i\text{Pr}$ - $\text{CH}_3$ ), 25.17 (s, amino-Dipp- $^i\text{Pr}$ - $\text{CH}_3$ ), 26.01 (d,  $^4\text{J}(\text{P-C})$  2.0 Hz, phosphine-Dipp- $^i\text{Pr}$ - $\text{CH}_3$ ), 28.23 (s, amino-Dipp- $^i\text{Pr}$ -CH), 33.03 (d,  $^3\text{J}(\text{P-C})$  7.5 Hz, phosphino-Dipp- $^i\text{Pr}$ -CH), 123.00 (s, phosphino-Dipp-*m*-C), 123.43 (s, amino-Dipp-*m*-C), 126.80 (s, amino-Dipp-*p*-C), 127.24 (d,  $^3\text{J}(\text{P-C})$  15.7 Hz, *o*- $\text{C-C}_6\text{H}_4$ ), 128.35 (s, *m*- $\text{C-C}_6\text{H}_4$ ), 129.50 (s, phosphino-Dipp-*p*-C), 134.38 (d,  $^5\text{J}(\text{P-C})$  29.5, *p*- $\text{C-C}_6\text{H}_4$ ), 135.14 (s, *ipso*- $\text{C-C}_6\text{H}_4$ ), 138.31 (d,  $^3\text{J}(\text{P-C})$  3.0 Hz, *ipso*- $\text{C-N}$ ), 144.53 (d,  $^4\text{J}(\text{P-C})$  2.1 Hz, amino-Dip-*o*-C), 153.79 (d,  $^2\text{J}(\text{P-C})$  4.8 Hz, phosphino-Dipp-*o*-C), 186.21 (d,  $^1\text{J}(\text{P-C})$  61.4 Hz,  $\text{P=C}$ )  
 $^{31}\text{P}$  NMR ( $\text{CDCl}_3$ ):  $\delta$  53.60 (~75%, s),  $\delta$  79.5 (~10%, d, 10 Hz),  $\delta$  -79.6 (5%).

$^{15}\text{N}$  NMR (major isomer,  $\text{CDCl}_3$ ):  $\delta$  -272.2 ppm ( $^1\text{J}(\text{N-H}) = 90.7$  Hz)

MS(70eV): *m/z* 471 ( $\text{M}^+$ , 23%); 428 ( $\text{M} - ^i\text{Pr}$ , 100%); 278 ( $\text{M} - \text{C}_6\text{H}_3^i\text{Pr}_2\text{H}^+$ , 81%); 176 ( $\text{C}_6\text{H}_3^i\text{Pr}_2\text{NH}^+$ ); 105 ( $\text{C}_8\text{H}_9^+$ , 20); 91 ( $\text{C}_6\text{H}_5\text{N}^+$ , 16).

IR ( $\text{CH}_2\text{Cl}_2$ )  $\text{cm}^{-1}$ : 3385(w), 3349(m), 3025(w), 2907(s), 2806(w), 2726(w), 2590(w), 2069(vs), 1942(w), 1905(w), 1873(w), 1803(w), 1709(w), 1666(m), 1659(w), 1641(w), 1607(s), 1586(s), 1565(s), 1510(m), 1501(m), 1493(s), 1484(s), 1468(m), 1383(m), 1345(s), 1203(m), 1180(m), 1111(m), 1056(s), 1007(w), 932(w), 820(w).

IR ( $\text{CHCl}_3$ )  $\text{cm}^{-1}$ : 3350 (w), 2955 (m), 2928 (m), 2866 (m), 1939 (w), 1870 (w), 1666 (w), 1606 (m), 1587 (m), 1565 (m), 1485 (m), 1462 (vs), 1454 (s), 1383 (m), 1345 (vs), 1310 (m), 1264 (w), 1101 (vs), 1002 (s), 889 (w), 866 (w), 833 (w).

IR (n-heptane)  $\text{cm}^{-1}$ : 3354(vs), 1932(m), 1955(w), 1947(w), 1896(w), 1888(s), 1863(m), 1795(w), 1692(m), 1642(m), 1608(s), 1566(s), 1324(m), 1255(m), 1203(s), 1179(vs), 1111(s), 1055(m), 1038(m), 1007(m), 814(vs), 800(vs), 755(w).

IR (KBr)  $\text{cm}^{-1}$ : 3351(m), 3055(w), 3020(w), 2961(vs), 2925(s), 2867(s), 1588(w), 1563(w), 1492(s), 1466(s), 1385(m), 1349(s), 1308(m), 1278(w), 1254(w), 1204(w), 1183(w), 1110(w), 1056(w), 931(w), 816(m), 802(m), 795(m), 755(m), 746(m), 712(w).

UV (methanol):  $\lambda_{\text{max}}$  203 ( $\epsilon$  74 000), 232 ( $\epsilon$  24 000), 267 ( $\epsilon$  13 000), 347 ( $\epsilon$  9600).

UV (n-hexane):  $\lambda_{\text{max}}$  231 ( $\epsilon$  20 000), 272 ( $\epsilon$  11 000), 356 ( $\epsilon$  14 000).

### Preparation of [Li(*E-syn* N,P-Diphosphoamidinate)(THF)<sub>3</sub>], **3**

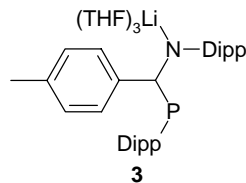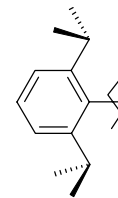

Dipp = 2,6-diisopropylphenyl

*n*-Butyl lithium (1.6M in hexane, 0.55  $\text{cm}^3$ , 0.88 mmol) was added dropwise to a stirred yellow solution of **2** (0.42 g, 0.89 mmol) in THF (40  $\text{cm}^3$ ) at  $-30$   $^\circ\text{C}$ . The resulting solution, which became deep orange upon addition, was gradually warmed to ambient temperature and stirred overnight. Filtration followed by removal of volatiles under reduced pressure rendered a light orange powder that was washed with cold ( $-10$   $^\circ\text{C}$ ) hexane (3 x 2  $\text{cm}^3$ ) and extracted into fresh THF (10  $\text{cm}^3$ ). Concentration *in vacuo* (ca. 4  $\text{cm}^3$ ) followed by placement at 0  $^\circ\text{C}$  yielded the title compound as light orange plates (0.37 g, 60 %), m.p. 127  $^\circ\text{C}$ .  $^1\text{H}$  NMR ( $d_8$ -THF, 303 K):  $\delta$  0.89 (d, 6H,  $\text{CH}(\text{CH}_3)$ ,  $^3J_{\text{HH}}$  6.7 Hz), 0.98 (d, 6H,  $\text{CH}(\text{CH}_3)$ ,  $^3J_{\text{HH}}$  6.9 Hz), 1.15 (d, 6H,  $\text{CH}(\text{CH}_3)$ ,  $^3J_{\text{HH}}$  6.8 Hz), 1.50 (d, 6H,  $\text{CH}(\text{CH}_3)$ ,  $^3J_{\text{HH}}$  6.8 Hz), 1.74 (m, 12H+,  $\text{CH}_2$ , THF), 2.08 (s, 3H,  $\text{CH}_3$ ), 3.56-3.60 (m, 14H,  $\text{CH}_2\text{O}$  and  $\text{CH}(\text{CH}_3)$ ), 4.18 (br s, 2H,  $\text{CH}(\text{CH}_3)$ ), 6.61-6.79 (m, 4H, Ar-*H*), 6.93-7.03 (m, 6H, Ar-*H*).  $^{13}\text{C}$  NMR ( $d_8$ -THF, 303 K):  $\delta$  17.2, 19.2, 21.5, 22.0 (s,  $\text{CH}(\text{CH}_3)$  or  $\text{CH}(\text{CH}_3)$ ), 22.5 (m,  $\text{CH}_2$ ), 24.5, 29.5, 29.6 (s,  $\text{CH}(\text{CH}_3)$  or  $\text{CH}(\text{CH}_3)$ ), 63.9 (m,  $\text{CH}_2\text{O}$ ), 117.6, 120.0, 122.4, 123.8, 124.8 (s, Ar-CH), 149.8 (d, NCP,  $^1J_{\text{CP}}$  6.9 Hz), other signals not observed.  $^{31}\text{P}$  NMR ( $d_8$ -THF, 303 K):  $\delta$  -22.9. IR (Nujol) /  $\text{cm}^{-1}$ : 1917 (sh w), 1901 (sh w), 1850 (sh w), 1789 (sh w), 1507 (sh m), 1460 (s), 1403 (sh m), 1377 (s), 1350 (s), 1306 (m), 1242 (m), 1222 (m), 1174 (sh m), 1098 (sh m), 1043 (s), 978 (sh m), 939 (w), 917 (m), 889(m), 818 (sh m), 801 (sh m), 766 (sh m), 745 (sh m), 668 (w). Anal. Calc. for  $\text{Li}_1\text{C}_{44}\text{H}_{65}\text{N}_1\text{P}_1\text{O}_3$ : C, 76.16; H, 9.44; N, 2.16. Found: C, 75.23; H, 10.00; N, 2.16.

Preparation of [Li(*E*-syn N,P-Dippphosphaamidate)(THF)<sub>n</sub>]<sub>n</sub> THF **4**

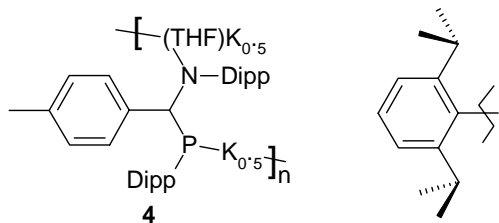

Dipp = 2,6-diisopropylphenyl

Potassium bis(trimethylsilyl)amide (0.5M in toluene, 0.55 cm<sup>3</sup>, 0.88 mmol) was added dropwise to a stirred yellow solution of **2** (0.72 g, 1.53 mmol) in THF (60 cm<sup>3</sup>) at -30 °C. The resulting solution warmed to ambient temperature and stirred for 4 hours, whereupon removal of volatiles *in vacuo* after filtration by canula gave a yellow solid. This was washed with cold (-10 °C) hexane (3 x 5 cm<sup>3</sup>) prior to extraction into fresh THF (20 cm<sup>3</sup>). Placement at 0 °C yielded ultra fine yellow needles of the title compound after

several days (0.63 g, 63%), m.p. 67 °C. <sup>1</sup>H NMR (*d*<sub>8</sub>-THF, 303 K): δ 0.91 (d, 6H, CH(CH<sub>3</sub>), <sup>3</sup>J<sub>HH</sub> 7.0 Hz), 0.96 (d, 6H, CH(CH<sub>3</sub>), <sup>3</sup>J<sub>HH</sub> 6.4 Hz), 1.16 (br s, 6H, CH(CH<sub>3</sub>)), 1.42 (d, 6H, CH(CH<sub>3</sub>), <sup>3</sup>J<sub>HH</sub> 6.3 Hz), 1.72 (m, 8H+, CH<sub>2</sub>, THF), 2.14 (br s, 3H, CH<sub>3</sub>), 3.53-3.58 (m, 10H, CH<sub>2</sub>O and CH(CH<sub>3</sub>)), 4.31 (br s, 2H, CH(CH<sub>3</sub>)), 6.73-7.22 (m, 10H, Ar-H). <sup>13</sup>C NMR (*d*<sub>8</sub>-THF, 303 K): δ 17.3, 19.6, 20.9 (s, CH(CH<sub>3</sub>) or CH(CH<sub>3</sub>)), 21.6 (m, CH<sub>2</sub>), 21.8, 24.7, 29.6, 29.8 (s, CH(CH<sub>3</sub>) or CH(CH<sub>3</sub>)), 63.5 (m, CH<sub>2</sub>O), 118.1, 119.5, 120.0, 123.7, 124.8, 125.5 (s, Ar-CH), 149.5 (d, NCP, <sup>1</sup>J<sub>CP</sub> 7.4 Hz), other signals not observed. <sup>31</sup>P NMR (*d*<sub>8</sub>-THF, 303 K): δ - 15.0. IR (Nujol) / cm<sup>-1</sup>: 1915 (w), 1854 (w), 1799 (w), 1505 (sh m), 1463 (s), 1430 (m), 1410 (sh m), 1377 (sh s), 1356 (m), 1306 (m), 1257 (m), 1228 (w), 1172 (sh m), 1098 (m), 1055 (sh m), 1032 (m), 971 (sh m), 942 (w), 839 (w), 80h (sh m), 772 (sh m), 743 (m), 683 (w). Anal. Calc. for K<sub>1</sub>C<sub>40</sub>H<sub>57</sub>N<sub>1</sub>P<sub>1</sub>O<sub>2</sub>: C, 73.47; H, 8.79; N, 2.14. Found: C, 73.16; H, 8.40; N, 2.45.

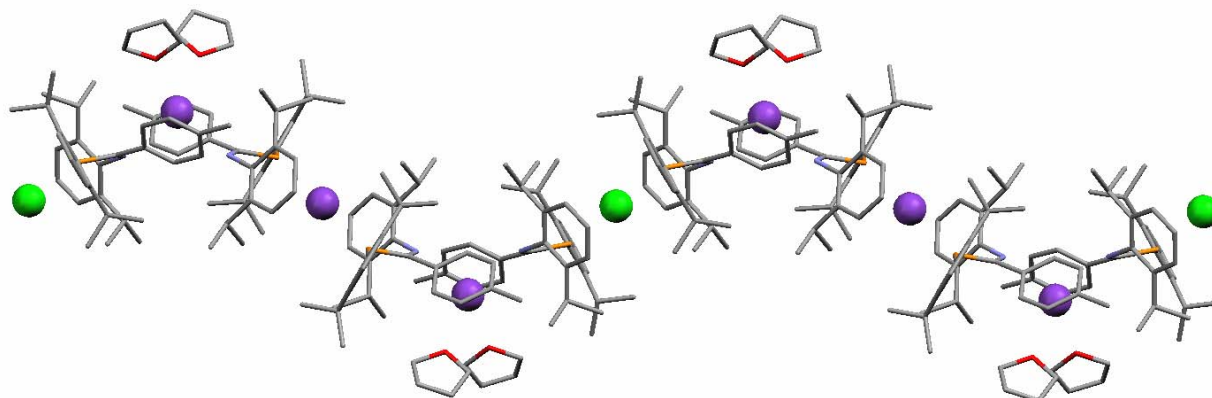

**Figure S2** A section of the infinite zigzag chain of ligands and potassium ions of **4** in the basal  $bc$  plane. K ions in green are located at  $0, \frac{1}{2}, -1$ ,  $0, \frac{1}{2}, 0$  and  $0, \frac{1}{2}, 1$  from right to left. These ions and the two half-way between them (the  $0, \frac{1}{2}, \frac{1}{2}$  set) are coordinated by two ligand phosphorus atoms through the in-plane lone pair and by 12 carbon atoms of the Dipp aromatic rings attached to nitrogen (two  $\eta^6$  interactions). The other K ions (the  $0, y, \frac{1}{2}$  set) which form the corners of the zigzags, are coordinated by two out-of-plane nitrogen lone pairs and two THF oxygen lone pairs; additional short contacts to the carbon atoms  $C_2$  and  $C_3$  of the backbone tolyl aromatic rings of two ligand molecules, provide further stabilization for these potassium ions. H atoms and the lattice THF molecule have been omitted for clarity.

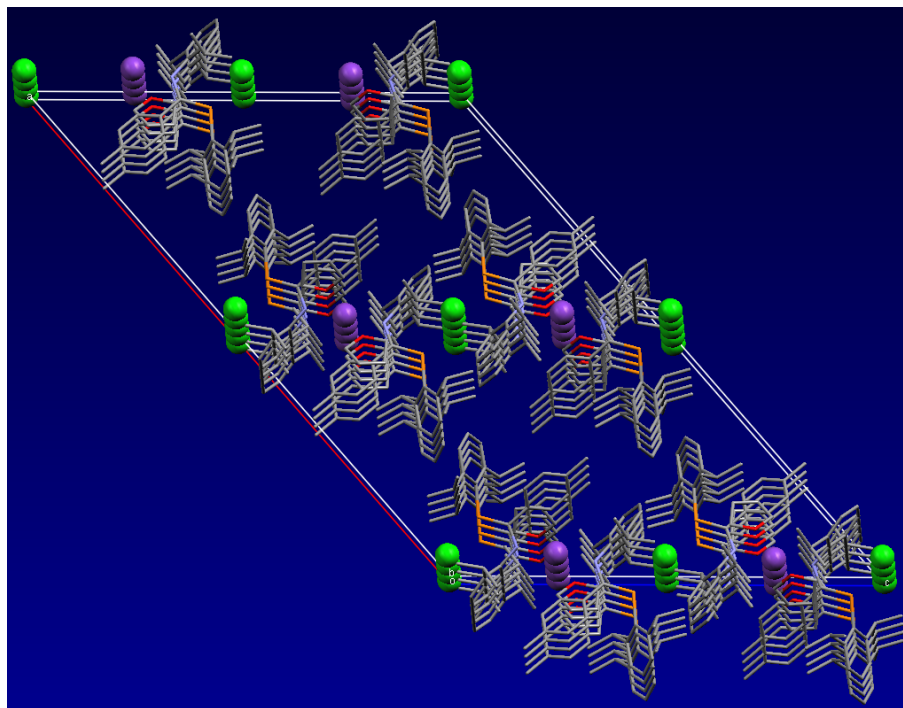

**Figure S3.** A packing diagram of **4** showing how the zigzag chains in the  $c$  direction of the lattice, at  $a = 0$  and  $a = \frac{1}{2}$ , combine into infinite ribbons of stacked ligand molecules. The lattice THF molecules fill gaps between the ribbons of ligands and metal ions, and are *not* shown in this diagram.

**Table S1 Crystal data and structure refinement for 2**

|                                   |                                                                                                                                             |
|-----------------------------------|---------------------------------------------------------------------------------------------------------------------------------------------|
| Identification code               | 2                                                                                                                                           |
| Empirical formula                 | C <sub>32</sub> H <sub>42</sub> NP                                                                                                          |
| Formula weight                    | 471.64                                                                                                                                      |
| Temperature                       | 293(2) K                                                                                                                                    |
| Wavelength                        | 0.71073 Å                                                                                                                                   |
| Crystal system                    | Monoclinic                                                                                                                                  |
| Space group                       | P2(1)/c                                                                                                                                     |
| Unit cell dimensions              | a = 18.2910(17) Å<br>b = 10.0442(5) Å<br>c = 18.1511(16) Å<br>β = 117.179(10)°                                                              |
| Volume                            | 2966.5(4) Å <sup>3</sup>                                                                                                                    |
| Z                                 | 4                                                                                                                                           |
| Density (calculated)              | 1.056 Mg/m <sup>3</sup>                                                                                                                     |
| Absorption coefficient            | 0.111 mm <sup>-1</sup>                                                                                                                      |
| F(000)                            | 1024                                                                                                                                        |
| Crystal size                      | 0.40 x 0.24 x 0.12 mm                                                                                                                       |
| Theta range for data collection   | 2.95 to 25.68°                                                                                                                              |
| Index ranges                      | -22 ≤ h ≤ 22, -12 ≤ k ≤ 12, -22 ≤ l ≤ 22                                                                                                    |
| Reflections collected             | 24466                                                                                                                                       |
| Independent reflections           | 5528 [R(int) = 0.0717]                                                                                                                      |
| Completeness to theta             | 25.68° (98.2%)                                                                                                                              |
| Absorption correction             | None                                                                                                                                        |
| Diffractometer                    | Stoe IPDS                                                                                                                                   |
| Refinement method                 | Full-matrix least-squares on F <sup>2</sup>                                                                                                 |
| Refinement software               | SHELXTL 5.16 (1998)                                                                                                                         |
| Data / restraints / parameters    | 5528 / 0 / 316                                                                                                                              |
| Final R indices [I > 2σ(I)]       | R <sub>1</sub> = 0.0460, wR <sub>2</sub> = 0.1056                                                                                           |
| R indices (all data)              | R <sub>1</sub> = 0.0954, wR <sub>2</sub> = 0.1217                                                                                           |
| Weighting scheme                  | w = 1/[σ <sup>2</sup> (F <sub>o</sub> <sup>2</sup> ) + (0.06400P)] with P = (F <sub>o</sub> <sup>2</sup> + 2F <sub>c</sub> <sup>2</sup> )/3 |
| Goodness-of-fit on F <sup>2</sup> | 0.814                                                                                                                                       |
| Largest diff. peak and hole       | 0.216 and -0.147 e.Å <sup>-3</sup>                                                                                                          |

**Table S2 Atomic coordinates (  $\times 10^4$ ) and equivalent isotropic displacement parameters ( $\text{\AA}^2 \times 10^3$ ) for 2.  $U(\text{eq})$  is defined as one third of the trace of the orthogonalized  $U^{ij}$  tensor.**

|       | x        | y        | z       | U(eq)  |
|-------|----------|----------|---------|--------|
| P(1)  | 7647(1)  | 4509(1)  | 1169(1) | 68(1)  |
| N(1)  | 7493(1)  | 3132(2)  | 2377(1) | 57(1)  |
| C(1)  | 7465(1)  | 3129(2)  | 1611(1) | 52(1)  |
| C(2)  | 7351(1)  | 1854(2)  | 1154(1) | 54(1)  |
| C(3)  | 7730(1)  | 687(2)   | 1546(1) | 62(1)  |
| C(4)  | 7692(2)  | -445(3)  | 1095(2) | 73(1)  |
| C(5)  | 7283(2)  | -453(3)  | 240(2)  | 76(1)  |
| C(6)  | 7290(2)  | -1668(3) | -250(2) | 115(1) |
| C(7)  | 6881(2)  | 701(3)   | -151(2) | 83(1)  |
| C(8)  | 6906(2)  | 1842(3)  | 293(1)  | 71(1)  |
| C(9)  | 7288(1)  | 2135(2)  | 2815(1) | 54(1)  |
| C(10) | 6508(2)  | 1555(2)  | 2476(1) | 60(1)  |
| C(11) | 5812(2)  | 1951(3)  | 1644(1) | 71(1)  |
| C(12) | 5159(2)  | 2731(4)  | 1769(2) | 116(1) |
| C(13) | 5447(2)  | 761(3)   | 1065(2) | 114(1) |
| C(14) | 6356(2)  | 629(3)   | 2962(2) | 76(1)  |
| C(15) | 6932(2)  | 333(3)   | 3751(2) | 85(1)  |
| C(16) | 7682(2)  | 930(3)   | 4076(1) | 79(1)  |
| C(17) | 7890(2)  | 1841(2)  | 3622(1) | 62(1)  |
| C(18) | 8720(2)  | 2524(3)  | 3990(1) | 79(1)  |
| C(19) | 8675(2)  | 3878(4)  | 4371(2) | 113(1) |
| C(20) | 9415(2)  | 1675(5)  | 4621(2) | 136(2) |
| C(21) | 7851(2)  | 5786(2)  | 1972(1) | 64(1)  |
| C(22) | 7208(2)  | 6445(3)  | 2041(2) | 73(1)  |
| C(23) | 6320(2)  | 6072(3)  | 1507(2) | 89(1)  |
| C(24) | 5961(2)  | 6777(4)  | 661(2)  | 145(2) |
| C(25) | 5750(3)  | 6307(5)  | 1895(3) | 171(2) |
| C(26) | 7405(3)  | 7485(3)  | 2610(2) | 99(1)  |
| C(27) | 8194(3)  | 7861(3)  | 3089(2) | 116(1) |
| C(28) | 8825(3)  | 7229(3)  | 3030(2) | 106(1) |
| C(29) | 8674(2)  | 6174(3)  | 2476(2) | 78(1)  |
| C(30) | 9390(2)  | 5465(4)  | 2436(2) | 107(1) |
| C(31) | 9652(4)  | 6162(6)  | 1871(4) | 219(3) |
| C(32) | 10106(3) | 5192(5)  | 3281(3) | 172(2) |

**Table S3 Bond lengths [Å] and angles [°] for 2**

---

|                 |            |                   |            |
|-----------------|------------|-------------------|------------|
| P(1)-C(1)       | 1.709(2)   | C(4)-C(3)-C(2)    | 121.0(2)   |
| P(1)-C(21)      | 1.846(2)   | C(5)-C(4)-C(3)    | 121.6(2)   |
| N(1)-C(1)       | 1.367(2)   | C(4)-C(5)-C(7)    | 117.4(2)   |
| N(1)-C(9)       | 1.430(3)   | C(4)-C(5)-C(6)    | 121.3(3)   |
| C(1)-C(2)       | 1.488(3)   | C(7)-C(5)-C(6)    | 121.3(3)   |
| C(2)-C(3)       | 1.382(3)   | C(5)-C(7)-C(8)    | 121.6(2)   |
| C(2)-C(8)       | 1.393(3)   | C(7)-C(8)-C(2)    | 120.4(2)   |
| C(3)-C(4)       | 1.384(3)   | C(10)-C(9)-C(17)  | 121.85(19) |
| C(4)-C(5)       | 1.380(3)   | C(10)-C(9)-N(1)   | 121.40(18) |
| C(5)-C(7)       | 1.383(4)   | C(17)-C(9)-N(1)   | 116.6(2)   |
| C(5)-C(6)       | 1.515(4)   | C(14)-C(10)-C(9)  | 117.3(2)   |
| C(7)-C(8)       | 1.390(3)   | C(14)-C(10)-C(11) | 119.0(2)   |
| C(9)-C(10)      | 1.397(3)   | C(9)-C(10)-C(11)  | 123.57(19) |
| C(9)-C(17)      | 1.405(3)   | C(10)-C(11)-C(13) | 112.5(2)   |
| C(10)-C(14)     | 1.396(3)   | C(10)-C(11)-C(12) | 110.1(2)   |
| C(10)-C(11)     | 1.517(3)   | C(13)-C(11)-C(12) | 112.1(3)   |
| C(11)-C(13)     | 1.529(4)   | C(15)-C(14)-C(10) | 121.8(3)   |
| C(11)-C(12)     | 1.531(4)   | C(16)-C(15)-C(14) | 120.0(2)   |
| C(14)-C(15)     | 1.369(4)   | C(15)-C(16)-C(17) | 121.8(2)   |
| C(15)-C(16)     | 1.360(4)   | C(16)-C(17)-C(9)  | 117.3(2)   |
| C(16)-C(17)     | 1.396(3)   | C(16)-C(17)-C(18) | 121.7(2)   |
| C(17)-C(18)     | 1.515(4)   | C(9)-C(17)-C(18)  | 120.9(2)   |
| C(18)-C(20)     | 1.525(4)   | C(17)-C(18)-C(20) | 113.7(3)   |
| C(18)-C(19)     | 1.545(4)   | C(17)-C(18)-C(19) | 110.4(2)   |
| C(21)-C(22)     | 1.404(3)   | C(20)-C(18)-C(19) | 110.6(3)   |
| C(21)-C(29)     | 1.413(4)   | C(22)-C(21)-C(29) | 120.0(2)   |
| C(22)-C(26)     | 1.396(4)   | C(22)-C(21)-P(1)  | 121.5(2)   |
| C(22)-C(23)     | 1.511(4)   | C(29)-C(21)-P(1)  | 118.29(18) |
| C(23)-C(25)     | 1.519(4)   | C(26)-C(22)-C(21) | 118.4(3)   |
| C(23)-C(24)     | 1.540(4)   | C(26)-C(22)-C(23) | 119.9(3)   |
| C(26)-C(27)     | 1.355(5)   | C(21)-C(22)-C(23) | 121.7(2)   |
| C(27)-C(28)     | 1.364(5)   | C(22)-C(23)-C(25) | 115.4(3)   |
| C(28)-C(29)     | 1.399(4)   | C(22)-C(23)-C(24) | 111.6(2)   |
| C(29)-C(30)     | 1.522(4)   | C(25)-C(23)-C(24) | 108.7(3)   |
| C(30)-C(31)     | 1.490(5)   | C(27)-C(26)-C(22) | 121.5(3)   |
| C(30)-C(32)     | 1.519(5)   | C(26)-C(27)-C(28) | 120.7(3)   |
|                 |            | C(27)-C(28)-C(29) | 120.9(3)   |
|                 |            | C(28)-C(29)-C(21) | 118.4(3)   |
|                 |            | C(28)-C(29)-C(30) | 119.8(3)   |
| C(1)-P(1)-C(21) | 101.86(9)  | C(21)-C(29)-C(30) | 121.7(2)   |
| C(1)-N(1)-C(9)  | 131.69(18) | C(31)-C(30)-C(32) | 112.4(4)   |
| N(1)-C(1)-C(2)  | 120.02(17) | C(31)-C(30)-C(29) | 111.6(3)   |
| N(1)-C(1)-P(1)  | 123.37(16) | C(32)-C(30)-C(29) | 113.5(3)   |
| C(2)-C(1)-P(1)  | 116.34(13) |                   |            |
| C(3)-C(2)-C(8)  | 117.9(2)   |                   |            |
| C(3)-C(2)-C(1)  | 122.25(18) |                   |            |
| C(8)-C(2)-C(1)  | 119.6(2)   |                   |            |

---

**Table S4 Anisotropic displacement parameters ( $\text{\AA}^2 \times 10^3$ ) for 2. The anisotropic displacement factor exponent takes the form:  $-2\pi^2 [ h^2 a^{*2} U^{11} + \dots + 2 h k a^* b^* U^{12} ]$**

|       | U <sup>11</sup> | U <sup>22</sup> | U <sup>33</sup> | U <sup>23</sup> | U <sup>13</sup> | U <sup>12</sup> |
|-------|-----------------|-----------------|-----------------|-----------------|-----------------|-----------------|
| P(1)  | 98(1)           | 58(1)           | 62(1)           | -1(1)           | 50(1)           | -6(1)           |
| N(1)  | 79(1)           | 50(1)           | 49(1)           | -1(1)           | 34(1)           | -5(1)           |
| C(1)  | 57(1)           | 55(1)           | 47(1)           | 1(1)            | 26(1)           | 2(1)            |
| C(2)  | 58(1)           | 55(1)           | 56(1)           | -6(1)           | 32(1)           | -6(1)           |
| C(3)  | 69(2)           | 57(2)           | 65(1)           | -3(1)           | 35(1)           | 2(1)            |
| C(4)  | 84(2)           | 56(2)           | 92(2)           | -8(1)           | 52(1)           | -4(1)           |
| C(5)  | 91(2)           | 64(2)           | 91(2)           | -23(1)          | 58(2)           | -17(2)          |
| C(6)  | 158(3)          | 85(2)           | 137(3)          | -48(2)          | 99(2)           | -32(2)          |
| C(7)  | 98(2)           | 93(2)           | 64(1)           | -24(1)          | 41(1)           | -22(2)          |
| C(8)  | 81(2)           | 73(2)           | 58(1)           | -7(1)           | 31(1)           | -6(1)           |
| C(9)  | 72(2)           | 48(1)           | 50(1)           | 5(1)            | 34(1)           | 6(1)            |
| C(10) | 72(2)           | 56(1)           | 60(1)           | 2(1)            | 38(1)           | 0(1)            |
| C(11) | 63(2)           | 79(2)           | 72(1)           | 5(1)            | 31(1)           | 1(1)            |
| C(12) | 95(2)           | 145(3)          | 128(3)          | 36(2)           | 68(2)           | 37(2)           |
| C(13) | 110(3)          | 106(3)          | 94(2)           | -8(2)           | 19(2)           | -24(2)          |
| C(14) | 95(2)           | 66(2)           | 86(2)           | 2(1)            | 58(2)           | -7(1)           |
| C(15) | 125(3)          | 70(2)           | 79(2)           | 17(1)           | 64(2)           | 4(2)            |
| C(16) | 112(2)          | 77(2)           | 55(1)           | 15(1)           | 44(1)           | 18(2)           |
| C(17) | 77(2)           | 64(2)           | 50(1)           | 3(1)            | 33(1)           | 11(1)           |
| C(18) | 78(2)           | 98(2)           | 57(1)           | -3(1)           | 25(1)           | 8(2)            |
| C(19) | 112(3)          | 124(3)          | 102(2)          | -48(2)          | 46(2)           | -26(2)          |
| C(20) | 98(3)           | 185(4)          | 94(2)           | 27(2)           | 18(2)           | 36(3)           |
| C(21) | 93(2)           | 48(1)           | 62(1)           | 5(1)            | 46(1)           | 2(1)            |
| C(22) | 104(2)          | 55(2)           | 78(2)           | 7(1)            | 57(2)           | 8(1)            |
| C(23) | 106(2)          | 70(2)           | 115(2)          | 17(2)           | 71(2)           | 18(2)           |
| C(24) | 111(3)          | 147(4)          | 158(3)          | 69(3)           | 44(3)           | 16(2)           |
| C(25) | 175(4)          | 167(4)          | 254(5)          | -27(4)          | 170(4)          | -5(3)           |
| C(26) | 155(3)          | 62(2)           | 107(2)          | -5(2)           | 83(2)           | 15(2)           |
| C(27) | 196(4)          | 70(2)           | 93(2)           | -21(2)          | 75(3)           | -5(3)           |
| C(28) | 137(3)          | 80(2)           | 83(2)           | -19(2)          | 36(2)           | -19(2)          |
| C(29) | 99(2)           | 61(2)           | 74(2)           | -2(1)           | 39(2)           | -3(2)           |
| C(30) | 86(2)           | 113(3)          | 114(2)          | -18(2)          | 38(2)           | -10(2)          |
| C(31) | 245(6)          | 233(6)          | 288(7)          | 82(5)           | 217(6)          | 57(5)           |
| C(32) | 109(3)          | 199(5)          | 180(4)          | 18(4)           | 42(3)           | 19(3)           |



**Table S5 Hydrogen coordinates (  $\times 10^4$ ) and isotropic displacement parameters ( $\text{\AA}^2 \times 10^{-3}$ ) for 2.**

|        | x     | y     | z    | U(eq) |
|--------|-------|-------|------|-------|
| H(1)   | 7665  | 3867  | 2644 | 69    |
| H(3)   | 8014  | 661   | 2121 | 74    |
| H(4)   | 7947  | -1220 | 1374 | 88    |
| H(6A)  | 6800  | -1679 | -771 | 172   |
| H(6B)  | 7310  | -2458 | 56   | 172   |
| H(6C)  | 7763  | -1639 | -348 | 172   |
| H(7)   | 6586  | 715   | -726 | 100   |
| H(8)   | 6625  | 2602  | 15   | 85    |
| H(11)  | 6043  | 2554  | 1379 | 85    |
| H(12A) | 4893  | 2151  | 1994 | 174   |
| H(12B) | 4758  | 3076  | 1247 | 174   |
| H(12C) | 5414  | 3454  | 2146 | 174   |
| H(13A) | 5875  | 304   | 1001 | 170   |
| H(13B) | 5040  | 1068  | 535  | 170   |
| H(13C) | 5197  | 164   | 1297 | 170   |
| H(14)  | 5849  | 201   | 2744 | 91    |
| H(15)  | 6811  | -277  | 4066 | 102   |
| H(16)  | 8066  | 725   | 4615 | 95    |
| H(18)  | 8852  | 2706  | 3533 | 95    |
| H(19A) | 8210  | 4371  | 3980 | 170   |
| H(19B) | 9169  | 4374  | 4504 | 170   |
| H(19C) | 8619  | 3732  | 4865 | 170   |
| H(20A) | 9338  | 1563  | 5106 | 203   |
| H(20B) | 9931  | 2108  | 4770 | 203   |
| H(20C) | 9414  | 819   | 4385 | 203   |
| H(23)  | 6308  | 5114  | 1398 | 107   |
| H(24A) | 5980  | 7723  | 742  | 218   |
| H(24B) | 5401  | 6502  | 334  | 218   |
| H(24C) | 6278  | 6544  | 379  | 218   |
| H(25A) | 5973  | 5887  | 2429 | 256   |
| H(25B) | 5219  | 5937  | 1545 | 256   |
| H(25C) | 5697  | 7246  | 1957 | 256   |
| H(26)  | 6985  | 7929  | 2661 | 119   |
| H(27)  | 8306  | 8558  | 3463 | 140   |
| H(28)  | 9362  | 7502  | 3362 | 127   |
| H(30)  | 9182  | 4593  | 2185 | 128   |
| H(31A) | 9188  | 6268  | 1336 | 328   |
| H(31B) | 10068 | 5647  | 1818 | 328   |
| H(31C) | 9870  | 7022  | 2095 | 328   |
| H(32A) | 10496 | 4622  | 3220 | 258   |
| H(32B) | 9907  | 4764  | 3627 | 258   |
| H(32C) | 10367 | 6017  | 3530 | 258   |

**Table S11 Crystal data and structure refinement for 3**

|                                   |                                                                                                                           |
|-----------------------------------|---------------------------------------------------------------------------------------------------------------------------|
| Identification code               | Compound 3                                                                                                                |
| Empirical formula                 | C <sub>44</sub> H <sub>65</sub> Li N O <sub>3</sub> P                                                                     |
| Formula weight                    | 693.88                                                                                                                    |
| Temperature                       | 123(2) K                                                                                                                  |
| Wavelength                        | 0.71073 Å                                                                                                                 |
| Crystal system, space group       | Monoclinic, P2(1)/c                                                                                                       |
| Unit cell dimensions              | a = 10.9877(3) Å    alpha = 90 deg.<br>b = 17.6089(5) Å    beta = 91.2790(10) deg.<br>c = 21.4172(8) Å    gamma = 90 deg. |
| Volume                            | 4142.8(2) Å <sup>3</sup>                                                                                                  |
| Z, Calculated density             | 4, 1.113 Mg/m <sup>3</sup>                                                                                                |
| Absorption coefficient            | 0.104 mm <sup>-1</sup>                                                                                                    |
| F(000)                            | 1512                                                                                                                      |
| Crystal size                      | 0.20 x 0.15 x 0.15 mm                                                                                                     |
| Theta range for data collection   | 3.56 to 27.87 deg.                                                                                                        |
| Limiting indices                  | -14<=h<=11, -23<=k<=20, -23<=l<=28                                                                                        |
| Reflections collected / unique    | 40099 / 9780 [R(int) = 0.1370]                                                                                            |
| Completeness to theta = 27.87     | 99.1 %                                                                                                                    |
| Absorption correction             | None                                                                                                                      |
| Max. and min. transmission        | 0.9846 and 0.9795                                                                                                         |
| Refinement method                 | Full-matrix least-squares on F <sup>2</sup>                                                                               |
| Data / restraints / parameters    | 9780 / 0 / 460                                                                                                            |
| Goodness-of-fit on F <sup>2</sup> | 0.967                                                                                                                     |
| Final R indices [I>2sigma(I)]     | R1 = 0.0599, wR2 = 0.1098                                                                                                 |
| R indices (all data)              | R1 = 0.1945, wR2 = 0.1425                                                                                                 |
| Largest diff. peak and hole       | 0.610 and -0.371 e.Å <sup>-3</sup>                                                                                        |
| Note:                             | All hydrogen atoms placed in calculated positions (riding model).                                                         |

**Table S12. Atomic coordinates ( $\times 10^4$ ) and equivalent isotropic displacement parameters ( $\text{\AA}^2 \times 10^3$ ) for [Li(N,P-Dipamidine)(THF)<sub>3</sub>].  $U(\text{eq})$  is defined as one third of the trace of the orthogonalized  $U_{ij}$  tensor.**

|       | x        | y        | z       | $U(\text{eq})$ |
|-------|----------|----------|---------|----------------|
| P(1)  | 2565(1)  | 8273(1)  | 1801(1) | 22(1)          |
| O(1)  | 2604(2)  | 7924(1)  | -923(1) | 36(1)          |
| N(1)  | 2084(2)  | 7722(1)  | 629(1)  | 18(1)          |
| C(1)  | 2336(2)  | 8333(1)  | 984(1)  | 18(1)          |
| Li(1) | 1712(3)  | 7399(2)  | -280(2) | 29(1)          |
| O(2)  | 0(1)     | 7439(1)  | -630(1) | 33(1)          |
| C(2)  | 2452(2)  | 9061(1)  | 632(1)  | 18(1)          |
| O(3)  | 2023(1)  | 6295(1)  | -527(1) | 32(1)          |
| C(3)  | 1529(2)  | 9320(1)  | 233(1)  | 24(1)          |
| C(4)  | 1659(2)  | 9987(1)  | -113(1) | 30(1)          |
| C(5)  | 2718(2)  | 10414(1) | -71(1)  | 28(1)          |
| C(6)  | 2897(3)  | 11120(1) | -461(1) | 43(1)          |
| C(7)  | 3633(2)  | 10160(1) | 335(1)  | 27(1)          |
| C(8)  | 3509(2)  | 9500(1)  | 679(1)  | 22(1)          |
| C(9)  | 2082(2)  | 7020(1)  | 965(1)  | 20(1)          |
| C(10) | 983(2)   | 6717(1)  | 1184(1) | 22(1)          |
| C(11) | -202(2)  | 7155(1)  | 1129(1) | 27(1)          |
| C(12) | -1152(2) | 6734(2)  | 732(1)  | 41(1)          |
| C(13) | -708(2)  | 7340(2)  | 1770(1) | 39(1)          |
| C(14) | 1006(2)  | 6001(1)  | 1457(1) | 29(1)          |
| C(15) | 2073(2)  | 5588(1)  | 1520(1) | 31(1)          |
| C(16) | 3156(2)  | 5904(1)  | 1319(1) | 28(1)          |
| C(17) | 3187(2)  | 6620(1)  | 1048(1) | 23(1)          |
| C(18) | 4396(2)  | 6975(1)  | 860(1)  | 25(1)          |
| C(19) | 4881(2)  | 6620(2)  | 265(1)  | 39(1)          |
| C(20) | 5353(2)  | 6933(2)  | 1387(1) | 38(1)          |
| C(21) | 2773(2)  | 9280(1)  | 2037(1) | 21(1)          |
| C(22) | 1769(2)  | 9785(1)  | 2076(1) | 23(1)          |
| C(23) | 470(2)   | 9514(1)  | 1950(1) | 24(1)          |
| C(24) | 8(2)     | 9135(1)  | 2541(1) | 30(1)          |
| C(25) | -408(2)  | 10139(2) | 1737(1) | 38(1)          |
| C(26) | 1970(2)  | 10528(1) | 2269(1) | 29(1)          |
| C(27) | 3112(2)  | 10786(1) | 2439(1) | 32(1)          |
| C(28) | 4087(2)  | 10293(1) | 2426(1) | 28(1)          |
| C(29) | 3946(2)  | 9547(1)  | 2227(1) | 23(1)          |
| C(30) | 5042(2)  | 9019(1)  | 2209(1) | 28(1)          |

|       |          |         |          |       |
|-------|----------|---------|----------|-------|
| C(31) | 5165(2)  | 8558(2) | 2813(1)  | 43(1) |
| C(32) | 6242(2)  | 9424(2) | 2076(1)  | 44(1) |
| C(33) | 3680(2)  | 8370(2) | -805(1)  | 42(1) |
| C(34) | 4314(3)  | 8376(2) | -1398(1) | 62(1) |
| C(35) | 3292(2)  | 8402(2) | -1885(1) | 44(1) |
| C(36) | 2273(2)  | 7984(2) | -1578(1) | 35(1) |
| C(37) | -502(2)  | 6896(2) | -1063(1) | 52(1) |
| C(38) | -1480(3) | 7327(2) | -1433(2) | 78(1) |
| C(39) | -1944(3) | 7862(2) | -968(2)  | 60(1) |
| C(40) | -802(2)  | 8083(2) | -601(1)  | 40(1) |
| C(41) | 1625(2)  | 5608(1) | -230(1)  | 38(1) |
| C(42) | 2707(3)  | 5080(2) | -260(1)  | 44(1) |
| C(43) | 3242(3)  | 5273(2) | -890(1)  | 55(1) |
| C(44) | 2728(2)  | 6051(2) | -1055(1) | 38(1) |

---

**Table S13. Bond lengths [Å] and angles [deg] for [Li(N,P-Dipamide)(THF) 3].**

---

|             |          |
|-------------|----------|
| P(1)-C(1)   | 1.765(2) |
| P(1)-C(21)  | 1.855(2) |
| O(1)-C(33)  | 1.437(3) |
| O(1)-C(36)  | 1.445(3) |
| O(1)-Li(1)  | 1.941(4) |
| N(1)-C(1)   | 1.343(3) |
| N(1)-C(9)   | 1.430(3) |
| N(1)-Li(1)  | 2.059(4) |
| C(1)-C(2)   | 1.494(3) |
| Li(1)-O(2)  | 2.010(4) |
| Li(1)-O(3)  | 2.046(4) |
| Li(1)-C(9)  | 2.771(5) |
| O(2)-C(37)  | 1.435(3) |
| O(2)-C(40)  | 1.438(3) |
| C(2)-C(3)   | 1.390(3) |
| C(2)-C(8)   | 1.398(3) |
| O(3)-C(41)  | 1.440(3) |
| O(3)-C(44)  | 1.451(3) |
| C(3)-C(4)   | 1.397(3) |
| C(4)-C(5)   | 1.386(3) |
| C(5)-C(7)   | 1.388(3) |
| C(5)-C(6)   | 1.513(3) |
| C(7)-C(8)   | 1.385(3) |
| C(9)-C(10)  | 1.410(3) |
| C(9)-C(17)  | 1.412(3) |
| C(10)-C(14) | 1.389(3) |
| C(10)-C(11) | 1.515(3) |
| C(11)-C(12) | 1.525(3) |
| C(11)-C(13) | 1.526(3) |
| C(14)-C(15) | 1.383(3) |
| C(15)-C(16) | 1.390(3) |
| C(16)-C(17) | 1.388(3) |
| C(17)-C(18) | 1.530(3) |
| C(18)-C(19) | 1.526(3) |
| C(18)-C(20) | 1.528(3) |
| C(21)-C(22) | 1.421(3) |
| C(21)-C(29) | 1.423(3) |
| C(22)-C(26) | 1.390(3) |
| C(22)-C(23) | 1.523(3) |

|                  |            |
|------------------|------------|
| C(23)-C(25)      | 1.527(3)   |
| C(23)-C(24)      | 1.527(3)   |
| C(26)-C(27)      | 1.375(3)   |
| C(27)-C(28)      | 1.380(3)   |
| C(28)-C(29)      | 1.389(3)   |
| C(29)-C(30)      | 1.523(3)   |
| C(30)-C(31)      | 1.530(3)   |
| C(30)-C(32)      | 1.531(3)   |
| C(33)-C(34)      | 1.462(4)   |
| C(34)-C(35)      | 1.516(4)   |
| C(35)-C(36)      | 1.505(3)   |
| C(37)-C(38)      | 1.523(4)   |
| C(38)-C(39)      | 1.471(4)   |
| C(39)-C(40)      | 1.516(4)   |
| C(41)-C(42)      | 1.513(3)   |
| C(42)-C(43)      | 1.523(4)   |
| C(43)-C(44)      | 1.520(4)   |
|                  |            |
| C(1)-P(1)-C(21)  | 103.11(10) |
| C(33)-O(1)-C(36) | 108.56(18) |
| C(33)-O(1)-Li(1) | 124.20(19) |
| C(36)-O(1)-Li(1) | 127.10(18) |
| C(1)-N(1)-C(9)   | 114.10(19) |
| C(1)-N(1)-Li(1)  | 142.23(19) |
| C(9)-N(1)-Li(1)  | 103.65(18) |
| N(1)-C(1)-C(2)   | 114.8(2)   |
| N(1)-C(1)-P(1)   | 122.50(17) |
| C(2)-C(1)-P(1)   | 122.64(17) |
| O(1)-Li(1)-O(2)  | 101.6(2)   |
| O(1)-Li(1)-O(3)  | 100.30(18) |
| O(2)-Li(1)-O(3)  | 95.58(18)  |
| O(1)-Li(1)-N(1)  | 116.5(2)   |
| O(2)-Li(1)-N(1)  | 120.48(19) |
| O(3)-Li(1)-N(1)  | 118.4(2)   |
| O(1)-Li(1)-C(9)  | 137.1(2)   |
| O(2)-Li(1)-C(9)  | 118.90(17) |
| O(3)-Li(1)-C(9)  | 89.90(16)  |
| N(1)-Li(1)-C(9)  | 30.11(9)   |
| C(37)-O(2)-C(40) | 109.04(19) |
| C(37)-O(2)-Li(1) | 124.11(19) |
| C(40)-O(2)-Li(1) | 125.52(19) |
| C(3)-C(2)-C(8)   | 117.1(2)   |
| C(3)-C(2)-C(1)   | 121.6(2)   |

|                   |            |
|-------------------|------------|
| C(8)-C(2)-C(1)    | 121.2(2)   |
| C(41)-O(3)-C(44)  | 105.51(18) |
| C(41)-O(3)-Li(1)  | 129.09(17) |
| C(44)-O(3)-Li(1)  | 125.39(18) |
| C(2)-C(3)-C(4)    | 121.4(2)   |
| C(5)-C(4)-C(3)    | 121.2(2)   |
| C(4)-C(5)-C(7)    | 117.4(2)   |
| C(4)-C(5)-C(6)    | 122.0(2)   |
| C(7)-C(5)-C(6)    | 120.5(2)   |
| C(8)-C(7)-C(5)    | 121.7(2)   |
| C(7)-C(8)-C(2)    | 121.2(2)   |
| C(10)-C(9)-C(17)  | 120.6(2)   |
| C(10)-C(9)-N(1)   | 120.4(2)   |
| C(17)-C(9)-N(1)   | 118.91(18) |
| C(10)-C(9)-Li(1)  | 107.63(17) |
| C(17)-C(9)-Li(1)  | 110.40(16) |
| N(1)-C(9)-Li(1)   | 46.24(13)  |
| C(14)-C(10)-C(9)  | 118.4(2)   |
| C(14)-C(10)-C(11) | 120.1(2)   |
| C(9)-C(10)-C(11)  | 121.5(2)   |
| C(10)-C(11)-C(12) | 111.9(2)   |
| C(10)-C(11)-C(13) | 111.6(2)   |
| C(12)-C(11)-C(13) | 110.24(19) |
| C(15)-C(14)-C(10) | 121.7(2)   |
| C(14)-C(15)-C(16) | 119.3(2)   |
| C(17)-C(16)-C(15) | 121.5(2)   |
| C(16)-C(17)-C(9)  | 118.5(2)   |
| C(16)-C(17)-C(18) | 120.8(2)   |
| C(9)-C(17)-C(18)  | 120.7(2)   |
| C(19)-C(18)-C(20) | 110.43(19) |
| C(19)-C(18)-C(17) | 112.0(2)   |
| C(20)-C(18)-C(17) | 111.8(2)   |
| C(22)-C(21)-C(29) | 118.4(2)   |
| C(22)-C(21)-P(1)  | 121.53(17) |
| C(29)-C(21)-P(1)  | 119.92(17) |
| C(26)-C(22)-C(21) | 119.3(2)   |
| C(26)-C(22)-C(23) | 119.3(2)   |
| C(21)-C(22)-C(23) | 121.3(2)   |
| C(22)-C(23)-C(25) | 114.3(2)   |
| C(22)-C(23)-C(24) | 108.5(2)   |
| C(25)-C(23)-C(24) | 110.06(18) |
| C(27)-C(26)-C(22) | 121.8(2)   |
| C(26)-C(27)-C(28) | 119.5(2)   |

|                   |            |
|-------------------|------------|
| C(27)-C(28)-C(29) | 121.3(2)   |
| C(28)-C(29)-C(21) | 119.7(2)   |
| C(28)-C(29)-C(30) | 120.1(2)   |
| C(21)-C(29)-C(30) | 120.2(2)   |
| C(29)-C(30)-C(31) | 110.94(18) |
| C(29)-C(30)-C(32) | 113.9(2)   |
| C(31)-C(30)-C(32) | 110.1(2)   |
| O(1)-C(33)-C(34)  | 104.9(2)   |
| C(33)-C(34)-C(35) | 103.8(2)   |
| C(36)-C(35)-C(34) | 103.3(2)   |
| O(1)-C(36)-C(35)  | 106.7(2)   |
| O(2)-C(37)-C(38)  | 105.1(2)   |
| C(39)-C(38)-C(37) | 102.7(3)   |
| C(38)-C(39)-C(40) | 102.6(2)   |
| O(2)-C(40)-C(39)  | 106.1(2)   |
| O(3)-C(41)-C(42)  | 104.56(19) |
| C(41)-C(42)-C(43) | 102.7(2)   |
| C(44)-C(43)-C(42) | 105.0(2)   |
| O(3)-C(44)-C(43)  | 106.7(2)   |



**Table S14. Anisotropic displacement parameters ( $\text{\AA}^2 \times 10^3$ ) for [Li(N,P-Dipamide)(THF)<sub>3</sub>]. The anisotropic displacement factor exponent takes the form:  $-2 \pi^2 [h^2 a^{*2} U_{11} + \dots + 2 h k a^* b^* U_{12}]$**

|       | U11   | U22   | U33   | U23    | U13   | U12    |
|-------|-------|-------|-------|--------|-------|--------|
| P(1)  | 26(1) | 23(1) | 18(1) | -1(1)  | -1(1) | -2(1)  |
| O(1)  | 44(1) | 42(1) | 21(1) | 1(1)   | 0(1)  | -18(1) |
| N(1)  | 20(1) | 18(1) | 17(1) | 0(1)   | 1(1)  | -1(1)  |
| C(1)  | 14(1) | 20(1) | 19(1) | 0(1)   | 2(1)  | 1(1)   |
| Li(1) | 30(2) | 32(3) | 25(3) | -3(2)  | 0(2)  | -2(2)  |
| O(2)  | 28(1) | 39(1) | 33(1) | -13(1) | -3(1) | 1(1)   |
| C(2)  | 18(1) | 18(1) | 18(1) | -4(1)  | 4(1)  | 1(1)   |
| O(3)  | 38(1) | 30(1) | 29(1) | -3(1)  | 7(1)  | 1(1)   |
| C(3)  | 21(1) | 27(2) | 25(2) | 2(1)   | -1(1) | 2(1)   |
| C(4)  | 31(2) | 31(2) | 28(2) | 5(1)   | 0(1)  | 9(1)   |
| C(5)  | 40(2) | 19(2) | 26(2) | 1(1)   | 10(1) | 4(1)   |
| C(6)  | 62(2) | 26(2) | 43(2) | 11(1)  | 17(2) | 6(1)   |
| C(7)  | 34(2) | 22(2) | 26(2) | -3(1)  | 10(1) | -8(1)  |
| C(8)  | 25(1) | 24(2) | 17(1) | -1(1)  | -1(1) | -2(1)  |
| C(9)  | 28(1) | 20(1) | 14(1) | -1(1)  | 0(1)  | -2(1)  |
| C(10) | 28(1) | 25(2) | 14(1) | -1(1)  | 2(1)  | -3(1)  |
| C(11) | 23(1) | 27(2) | 31(2) | 5(1)   | 3(1)  | -6(1)  |
| C(12) | 29(2) | 58(2) | 36(2) | -1(2)  | 0(1)  | -3(1)  |
| C(13) | 35(2) | 38(2) | 46(2) | -7(1)  | 10(1) | 0(1)   |
| C(14) | 31(2) | 27(2) | 28(2) | 6(1)   | 3(1)  | -4(1)  |
| C(15) | 45(2) | 21(2) | 28(2) | 9(1)   | 2(1)  | -3(1)  |
| C(16) | 34(2) | 27(2) | 24(2) | 2(1)   | 1(1)  | 7(1)   |
| C(17) | 29(1) | 22(2) | 19(1) | -1(1)  | 2(1)  | 2(1)   |
| C(18) | 21(1) | 26(2) | 28(2) | 2(1)   | 1(1)  | 5(1)   |
| C(19) | 36(2) | 46(2) | 36(2) | -4(1)  | 6(1)  | -2(1)  |
| C(20) | 29(1) | 45(2) | 38(2) | -2(1)  | -3(1) | 2(1)   |
| C(21) | 26(1) | 25(2) | 12(1) | 2(1)   | 1(1)  | -2(1)  |
| C(22) | 27(1) | 28(2) | 13(1) | -2(1)  | 2(1)  | -1(1)  |
| C(23) | 24(1) | 25(2) | 24(2) | -1(1)  | 1(1)  | 1(1)   |
| C(24) | 29(1) | 30(2) | 29(2) | 0(1)   | 4(1)  | 0(1)   |
| C(25) | 33(2) | 41(2) | 38(2) | 4(1)   | -7(1) | 1(1)   |
| C(26) | 33(2) | 27(2) | 27(2) | -8(1)  | -2(1) | 3(1)   |
| C(27) | 44(2) | 21(2) | 32(2) | -8(1)  | -3(1) | -6(1)  |
| C(28) | 30(1) | 33(2) | 22(2) | -4(1)  | -3(1) | -11(1) |
| C(29) | 26(1) | 28(2) | 13(1) | -3(1)  | 0(1)  | -5(1)  |
| C(30) | 24(1) | 35(2) | 24(2) | -7(1)  | -2(1) | -2(1)  |

|       |       |        |       |        |        |        |
|-------|-------|--------|-------|--------|--------|--------|
| C(31) | 38(2) | 56(2)  | 36(2) | 3(2)   | -5(1)  | 11(1)  |
| C(32) | 31(2) | 52(2)  | 49(2) | -16(2) | 6(1)   | -5(1)  |
| C(33) | 41(2) | 52(2)  | 34(2) | -5(2)  | 2(1)   | -18(1) |
| C(34) | 61(2) | 75(3)  | 50(2) | -1(2)  | 10(2)  | -26(2) |
| C(35) | 57(2) | 47(2)  | 29(2) | 4(1)   | 5(2)   | -14(2) |
| C(36) | 43(2) | 39(2)  | 23(2) | 4(1)   | -1(1)  | 1(1)   |
| C(37) | 43(2) | 61(2)  | 52(2) | -34(2) | -18(2) | 7(2)   |
| C(38) | 60(2) | 119(3) | 55(2) | -33(2) | -23(2) | 22(2)  |
| C(39) | 48(2) | 77(2)  | 55(2) | -12(2) | -16(2) | 19(2)  |
| C(40) | 36(2) | 37(2)  | 47(2) | -2(1)  | -6(1)  | 7(1)   |
| C(41) | 49(2) | 31(2)  | 35(2) | -4(1)  | 6(1)   | -9(1)  |
| C(42) | 64(2) | 25(2)  | 43(2) | -6(1)  | 2(2)   | -1(1)  |
| C(43) | 84(2) | 34(2)  | 48(2) | -2(2)  | 18(2)  | 14(2)  |
| C(44) | 47(2) | 42(2)  | 24(2) | -5(1)  | 4(1)   | 9(1)   |

---

**Table S15. Hydrogen coordinates (  $\times 10^4$ ) and isotropic displacement parameters ( $\text{\AA}^2 \times 10^3$ ) for [Li(N,P-Dipamide)(THF)<sub>3</sub>]<sub>3</sub>**

|        | x     | y     | z    | U(eq) |
|--------|-------|-------|------|-------|
| H(3)   | 794   | 9038  | 193  | 29    |
| H(4)   | 1011  | 10151 | -381 | 36    |
| H(6A)  | 2163  | 11216 | -716 | 65    |
| H(6B)  | 3593  | 11047 | -733 | 65    |
| H(6C)  | 3053  | 11555 | -185 | 65    |
| H(7)   | 4362  | 10447 | 378  | 33    |
| H(8)   | 4155  | 9342  | 951  | 27    |
| H(11)  | -27   | 7647  | 916  | 32    |
| H(12A) | -820  | 6624  | 321  | 61    |
| H(12B) | -1881 | 7051  | 681  | 61    |
| H(12C) | -1367 | 6257  | 938  | 61    |
| H(13A) | -962  | 6869  | 1974 | 59    |
| H(13B) | -1411 | 7679  | 1719 | 59    |
| H(13C) | -78   | 7590  | 2027 | 59    |
| H(14)  | 270   | 5790  | 1603 | 34    |
| H(15)  | 2065  | 5094  | 1698 | 38    |
| H(16)  | 3890  | 5624  | 1369 | 34    |
| H(18)  | 4239  | 7524  | 771  | 30    |
| H(19A) | 5642  | 6871  | 154  | 59    |
| H(19B) | 4280  | 6682  | -76  | 59    |
| H(19C) | 5033  | 6077  | 335  | 59    |
| H(20A) | 5600  | 6403  | 1451 | 56    |
| H(20B) | 5009  | 7132  | 1772 | 56    |
| H(20C) | 6064  | 7236  | 1276 | 56    |
| H(23)  | 491   | 9121  | 1614 | 29    |
| H(24A) | 528   | 8700  | 2648 | 44    |
| H(24B) | -830  | 8961  | 2467 | 44    |
| H(24C) | 30    | 9501  | 2885 | 44    |
| H(25A) | -526  | 10498 | 2080 | 56    |
| H(25B) | -1192 | 9913  | 1614 | 56    |
| H(25C) | -70   | 10408 | 1380 | 56    |
| H(26)  | 1300  | 10868 | 2284 | 35    |
| H(27)  | 3228  | 11299 | 2564 | 39    |

|        |       |       |       |    |
|--------|-------|-------|-------|----|
| H(28)  | 4871  | 10467 | 2556  | 34 |
| H(30)  | 4889  | 8649  | 1862  | 33 |
| H(31A) | 5331  | 8902  | 3165  | 65 |
| H(31B) | 5837  | 8196  | 2778  | 65 |
| H(31C) | 4407  | 8282  | 2883  | 65 |
| H(32A) | 6144  | 9731  | 1696  | 66 |
| H(32B) | 6884  | 9047  | 2018  | 66 |
| H(32C) | 6463  | 9754  | 2429  | 66 |
| H(33A) | 4194  | 8137  | -472  | 51 |
| H(33B) | 3463  | 8892  | -678  | 51 |
| H(34A) | 4813  | 7912  | -1445 | 74 |
| H(34B) | 4846  | 8827  | -1430 | 74 |
| H(35A) | 3057  | 8932  | -1983 | 53 |
| H(35B) | 3532  | 8145  | -2275 | 53 |
| H(36A) | 1499  | 8266  | -1632 | 42 |
| H(36B) | 2169  | 7473  | -1764 | 42 |
| H(37A) | -860  | 6461  | -840  | 63 |
| H(37B) | 133   | 6704  | -1344 | 63 |
| H(38A) | -1130 | 7599  | -1791 | 94 |
| H(38B) | -2130 | 6981  | -1587 | 94 |
| H(39A) | -2544 | 7615  | -696  | 72 |
| H(39B) | -2327 | 8310  | -1172 | 72 |
| H(40A) | -419  | 8535  | -789  | 48 |
| H(40B) | -997  | 8200  | -163  | 48 |
| H(41A) | 911   | 5390  | -456  | 46 |
| H(41B) | 1405  | 5706  | 208   | 46 |
| H(42A) | 2450  | 4541  | -243  | 53 |
| H(42B) | 3299  | 5180  | 85    | 53 |
| H(43A) | 4142  | 5290  | -860  | 66 |
| H(43B) | 2995  | 4893  | -1209 | 66 |
| H(44A) | 3395  | 6414  | -1133 | 45 |
| H(44B) | 2203  | 6019  | -1436 | 45 |

**Table S16 Crystal data and structure refinement for 4**

|                                   |                                                                                                                          |
|-----------------------------------|--------------------------------------------------------------------------------------------------------------------------|
| Identification code               | Compound 4                                                                                                               |
| Empirical formula                 | C <sub>40</sub> H <sub>57</sub> K N O <sub>2</sub> P                                                                     |
| Formula weight                    | 653.94                                                                                                                   |
| Temperature                       | 223(2) K                                                                                                                 |
| Wavelength                        | 0.71073 Å                                                                                                                |
| Crystal system, space group       | Monoclinic, C2/c                                                                                                         |
| Unit cell dimensions              | a = 35.6979(5) Å    alpha = 90 deg.<br>b = 12.2579(4) Å    beta = 131.306(2) deg.<br>c = 24.1180(5) Å    gamma = 90 deg. |
| Volume                            | 7927.8(3) Å <sup>3</sup>                                                                                                 |
| Z, Calculated density             | 8, 1.096 Mg/m <sup>3</sup>                                                                                               |
| Absorption coefficient            | 0.206 mm <sup>-1</sup>                                                                                                   |
| F(000)                            | 2832                                                                                                                     |
| Crystal size                      | 0.20 x 0.10 x 0.05 mm                                                                                                    |
| Theta range for data collection   | 2.82 to 27.85 deg.                                                                                                       |
| Limiting indices                  | -46<=h<=41, -16<=k<=15, -29<=l<=31                                                                                       |
| Reflections collected / unique    | 43531 / 9321 [R(int) = 0.2154]                                                                                           |
| Completeness to theta = 27.85     | 98.8 %                                                                                                                   |
| Absorption correction             | None                                                                                                                     |
| Max. and min. transmission        | 0.9898 and 0.9600                                                                                                        |
| Refinement method                 | Full-matrix least-squares on F <sup>2</sup>                                                                              |
| Data / restraints / parameters    | 9321 / 0 / 418                                                                                                           |
| Goodness-of-fit on F <sup>2</sup> | 0.975                                                                                                                    |
| Final R indices [I>2sigma(I)]     | R1 = 0.0892, wR2 = 0.1638                                                                                                |
| R indices (all data)              | R1 = 0.2776, wR2 = 0.2221                                                                                                |
| Largest diff. peak and hole       | 0.273 and -0.298 e.Å <sup>-3</sup>                                                                                       |

Note: All hydrogen atoms placed in calculated positions (riding model).  
Both lattice and coordinated THF experience moderate thermal motion.  
Attempted modelling of disorder for the lattice THF failed to yield  
satisfactory thermal parameters. Hence, it was left as is.

**Table S17. Atomic coordinates ( x 10<sup>4</sup>) and equivalent isotropic displacement parameters (Å<sup>2</sup> x 10<sup>3</sup>) for [K(\*\*\*\*\*)(THF)]<sub>n</sub>.nTHF 4. U(eq) is defined as one third of the trace of the orthogonalized Uij tensor.**

|       | x        | y         | z       | U(eq)  |              |
|-------|----------|-----------|---------|--------|--------------|
| K(1)  | 0        | 8006(1)   | 2500    | 68(1)  | Wyckoff 4(e) |
| K(2)  | 0        | 5000      | 0       | 77(1)  | Wyckoff 4(b) |
| P(1)  | 776(1)   | 6397(1)   | 1471(1) | 54(1)  |              |
| O(1)  | 476(2)   | 9838(4)   | 2548(5) | 167(2) |              |
| O(2)  | 2661(6)  | 11099(14) | 3756(9) | 359(7) |              |
| N(1)  | 145(1)   | 6552(2)   | 1737(2) | 45(1)  |              |
| C(1)  | 608(1)   | 6636(3)   | 2004(2) | 42(1)  |              |
| C(2)  | 968(1)   | 6956(3)   | 2804(2) | 45(1)  |              |
| C(3)  | 936(1)   | 6464(3)   | 3294(2) | 52(1)  |              |
| C(4)  | 1258(2)  | 6749(4)   | 4035(3) | 68(1)  |              |
| C(5)  | 1616(2)  | 7541(4)   | 4311(3) | 70(1)  |              |
| C(6)  | 1968(2)  | 7870(5)   | 5121(3) | 109(2) |              |
| C(7)  | 1653(2)  | 8027(4)   | 3833(3) | 71(1)  |              |
| C(8)  | 1336(2)  | 7733(3)   | 3090(3) | 60(1)  |              |
| C(9)  | -239(1)  | 6198(3)   | 995(2)  | 45(1)  |              |
| C(10) | -476(2)  | 6954(4)   | 403(3)  | 59(1)  |              |
| C(11) | -315(2)  | 8125(4)   | 537(3)  | 80(2)  |              |
| C(12) | -233(2)  | 8522(5)   | 22(3)   | 119(2) |              |
| C(13) | -698(2)  | 8858(4)   | 460(3)  | 108(2) |              |
| C(14) | -883(2)  | 6594(5)   | -308(3) | 74(1)  |              |
| C(15) | -1054(2) | 5538(5)   | -445(2) | 73(1)  |              |
| C(16) | -822(2)  | 4820(4)   | 134(2)  | 61(1)  |              |
| C(17) | -418(1)  | 5135(3)   | 854(2)  | 47(1)  |              |
| C(18) | -175(2)  | 4311(3)   | 1473(2) | 59(1)  |              |
| C(19) | 199(2)   | 3607(5)   | 1524(3) | 105(2) |              |
| C(20) | -545(2)  | 3584(4)   | 1415(3) | 78(1)  |              |
| C(21) | 1458(1)  | 6553(3)   | 2083(2) | 50(1)  |              |
| C(22) | 1797(2)  | 5773(4)   | 2615(2) | 55(1)  |              |
| C(23) | 1627(2)  | 4796(4)   | 2776(2) | 65(1)  |              |
| C(24) | 1665(2)  | 3755(4)   | 2480(3) | 102(2) |              |
| C(25) | 1901(2)  | 4667(5)   | 3598(3) | 99(2)  |              |
| C(26) | 2306(2)  | 5894(4)   | 3007(2) | 73(1)  |              |
| C(27) | 2485(2)  | 6772(5)   | 2893(3) | 87(2)  |              |
| C(28) | 2162(2)  | 7554(4)   | 2387(3) | 77(1)  |              |
| C(29) | 1651(2)  | 7471(4)   | 1979(3) | 63(1)  |              |

|       |         |           |          |         |
|-------|---------|-----------|----------|---------|
| C(30) | 1317(2) | 8388(4)   | 1447(3)  | 80(2)   |
| C(31) | 1165(3) | 8207(5)   | 707(3)   | 132(2)  |
| C(32) | 1533(2) | 9514(5)   | 1732(4)  | 117(2)  |
| C(33) | 573(3)  | 10194(6)  | 2088(5)  | 158(3)  |
| C(34) | 1037(3) | 10847(6)  | 2585(5)  | 154(3)  |
| C(35) | 1061(3) | 11201(6)  | 3182(6)  | 162(3)  |
| C(36) | 739(5)  | 10476(8)  | 3186(8)  | 249(7)  |
| C(37) | 2819(6) | 11809(11) | 4442(14) | 351(13) |
| C(38) | 2759(8) | 10680(20) | 4680(7)  | 368(12) |
| C(39) | 2343(6) | 10840(30) | 4163(16) | 409(16) |
| C(40) | 2571(6) | 10096(9)  | 3928(7)  | 242(6)  |

---

**Table S18. Bond lengths [Å] and angles [deg] for  $[\{K(\text{THF})\}_n]_n \cdot \text{THF} \cdot 4$ .**

---

|              |            |
|--------------|------------|
| K(1)-O(1)    | 2.772(5)   |
| K(1)-O(1)#1  | 2.772(5)   |
| K(1)-N(1)    | 2.844(3)   |
| K(1)-N(1)#1  | 2.844(3)   |
| K(1)-C(3)#1  | 3.154(4)   |
| K(1)-C(3)    | 3.154(4)   |
| K(1)-C(2)    | 3.284(3)   |
| K(1)-C(2)#1  | 3.284(3)   |
| K(1)-C(1)    | 3.519(4)   |
| K(1)-C(1)#1  | 3.519(4)   |
| K(2)-C(16)#2 | 3.166(4)   |
| K(2)-C(16)   | 3.166(4)   |
| K(2)-P(1)#2  | 3.1965(12) |
| K(2)-P(1)    | 3.1965(12) |
| K(2)-C(15)#2 | 3.225(4)   |
| K(2)-C(15)   | 3.225(4)   |
| K(2)-C(17)#2 | 3.248(3)   |
| K(2)-C(17)   | 3.248(3)   |
| K(2)-C(14)#2 | 3.348(5)   |
| K(2)-C(14)   | 3.348(5)   |
| K(2)-C(9)#2  | 3.368(4)   |
| K(2)-C(9)    | 3.368(4)   |
| P(1)-C(1)    | 1.767(4)   |
| P(1)-C(21)   | 1.841(4)   |
| O(1)-C(36)   | 1.397(11)  |
| O(1)-C(33)   | 1.432(8)   |
| O(2)-C(40)   | 1.399(13)  |
| O(2)-C(37)   | 1.606(19)  |
| N(1)-C(1)    | 1.324(4)   |
| N(1)-C(9)    | 1.424(5)   |
| C(1)-C(2)    | 1.501(5)   |
| C(2)-C(8)    | 1.383(5)   |
| C(2)-C(3)    | 1.397(5)   |
| C(3)-C(4)    | 1.387(6)   |
| C(4)-C(5)    | 1.379(6)   |
| C(5)-C(7)    | 1.379(6)   |
| C(5)-C(6)    | 1.523(6)   |
| C(7)-C(8)    | 1.394(6)   |
| C(9)-C(17)   | 1.392(5)   |
| C(9)-C(10)   | 1.420(5)   |



|                    |            |
|--------------------|------------|
| C(10)-C(14)        | 1.398(6)   |
| C(10)-C(11)        | 1.501(6)   |
| C(11)-C(12)        | 1.531(6)   |
| C(11)-C(13)        | 1.542(7)   |
| C(14)-C(15)        | 1.375(6)   |
| C(15)-C(16)        | 1.374(6)   |
| C(16)-C(17)        | 1.391(5)   |
| C(17)-C(18)        | 1.514(5)   |
| C(18)-C(20)        | 1.522(5)   |
| C(18)-C(19)        | 1.525(6)   |
| C(21)-C(22)        | 1.406(5)   |
| C(21)-C(29)        | 1.427(5)   |
| C(22)-C(26)        | 1.393(6)   |
| C(22)-C(23)        | 1.508(6)   |
| C(23)-C(24)        | 1.514(6)   |
| C(23)-C(25)        | 1.531(6)   |
| C(26)-C(27)        | 1.369(6)   |
| C(27)-C(28)        | 1.372(6)   |
| C(28)-C(29)        | 1.391(6)   |
| C(29)-C(30)        | 1.520(6)   |
| C(30)-C(31)        | 1.501(7)   |
| C(30)-C(32)        | 1.508(7)   |
| C(33)-C(34)        | 1.484(9)   |
| C(34)-C(35)        | 1.452(9)   |
| C(35)-C(36)        | 1.461(10)  |
| C(37)-C(38)        | 1.56(2)    |
| C(38)-C(39)        | 1.16(2)    |
| C(39)-C(40)        | 1.56(2)    |
| O(1)-K(1)-O(1)#1   | 71.7(2)    |
| O(1)-K(1)-N(1)     | 99.59(15)  |
| O(1)#1-K(1)-N(1)   | 148.07(19) |
| O(1)-K(1)-N(1)#1   | 148.07(19) |
| O(1)#1-K(1)-N(1)#1 | 99.59(15)  |
| N(1)-K(1)-N(1)#1   | 102.42(12) |
| O(1)-K(1)-C(3)#1   | 152.24(17) |
| O(1)#1-K(1)-C(3)#1 | 94.94(12)  |
| N(1)-K(1)-C(3)#1   | 78.68(10)  |
| N(1)#1-K(1)-C(3)#1 | 56.33(10)  |
| O(1)-K(1)-C(3)     | 94.94(12)  |
| O(1)#1-K(1)-C(3)   | 152.24(17) |
| N(1)-K(1)-C(3)     | 56.33(10)  |
| N(1)#1-K(1)-C(3)   | 78.68(10)  |

|                      |            |
|----------------------|------------|
| C(3)#1-K(1)-C(3)     | 106.38(15) |
| O(1)-K(1)-C(2)       | 77.47(11)  |
| O(1)#1-K(1)-C(2)     | 148.45(12) |
| N(1)-K(1)-C(2)       | 44.36(9)   |
| N(1)#1-K(1)-C(2)     | 102.93(9)  |
| C(3)#1-K(1)-C(2)     | 115.91(11) |
| C(3)-K(1)-C(2)       | 24.96(9)   |
| O(1)-K(1)-C(2)#1     | 148.45(12) |
| O(1)#1-K(1)-C(2)#1   | 77.47(11)  |
| N(1)-K(1)-C(2)#1     | 102.93(9)  |
| N(1)#1-K(1)-C(2)#1   | 44.36(9)   |
| C(3)#1-K(1)-C(2)#1   | 24.96(9)   |
| C(3)-K(1)-C(2)#1     | 115.91(11) |
| C(2)-K(1)-C(2)#1     | 133.84(14) |
| O(1)-K(1)-C(1)       | 84.41(13)  |
| O(1)#1-K(1)-C(1)     | 150.53(16) |
| N(1)-K(1)-C(1)       | 20.74(8)   |
| N(1)#1-K(1)-C(1)     | 109.73(9)  |
| C(3)#1-K(1)-C(1)     | 98.70(10)  |
| C(3)-K(1)-C(1)       | 43.70(9)   |
| C(2)-K(1)-C(1)       | 25.19(9)   |
| C(2)#1-K(1)-C(1)     | 122.07(9)  |
| O(1)-K(1)-C(1)#1     | 150.53(16) |
| O(1)#1-K(1)-C(1)#1   | 84.41(13)  |
| N(1)-K(1)-C(1)#1     | 109.73(9)  |
| N(1)#1-K(1)-C(1)#1   | 20.74(8)   |
| C(3)#1-K(1)-C(1)#1   | 43.70(9)   |
| C(3)-K(1)-C(1)#1     | 98.70(10)  |
| C(2)-K(1)-C(1)#1     | 122.07(9)  |
| C(2)#1-K(1)-C(1)#1   | 25.19(9)   |
| C(1)-K(1)-C(1)#1     | 123.02(12) |
| C(16)#2-K(2)-C(16)   | 180.00(12) |
| C(16)#2-K(2)-P(1)#2  | 96.14(8)   |
| C(16)-K(2)-P(1)#2    | 83.86(8)   |
| C(16)#2-K(2)-P(1)    | 83.86(8)   |
| C(16)-K(2)-P(1)      | 96.14(8)   |
| P(1)#2-K(2)-P(1)     | 180.00(4)  |
| C(16)#2-K(2)-C(15)#2 | 24.80(10)  |
| C(16)-K(2)-C(15)#2   | 155.20(10) |
| P(1)#2-K(2)-C(15)#2  | 103.08(10) |
| P(1)-K(2)-C(15)#2    | 76.92(10)  |
| C(16)#2-K(2)-C(15)   | 155.20(10) |
| C(16)-K(2)-C(15)     | 24.80(10)  |

|                      |            |
|----------------------|------------|
| P(1)#2-K(2)-C(15)    | 76.92(10)  |
| P(1)-K(2)-C(15)      | 103.07(10) |
| C(15)#2-K(2)-C(15)   | 180.00(15) |
| C(16)#2-K(2)-C(17)#2 | 25.01(9)   |
| C(16)-K(2)-C(17)#2   | 154.99(9)  |
| P(1)#2-K(2)-C(17)#2  | 72.17(7)   |
| P(1)-K(2)-C(17)#2    | 107.83(7)  |
| C(15)#2-K(2)-C(17)#2 | 43.77(10)  |
| C(15)-K(2)-C(17)#2   | 136.23(10) |
| C(16)#2-K(2)-C(17)   | 154.99(9)  |
| C(16)-K(2)-C(17)     | 25.01(9)   |
| P(1)#2-K(2)-C(17)    | 107.83(7)  |
| P(1)-K(2)-C(17)      | 72.17(7)   |
| C(15)#2-K(2)-C(17)   | 136.23(10) |
| C(15)-K(2)-C(17)     | 43.77(10)  |
| C(17)#2-K(2)-C(17)   | 180.00(17) |
| C(16)#2-K(2)-C(14)#2 | 42.53(11)  |
| C(16)-K(2)-C(14)#2   | 137.47(11) |
| P(1)#2-K(2)-C(14)#2  | 86.16(10)  |
| P(1)-K(2)-C(14)#2    | 93.84(10)  |
| C(15)#2-K(2)-C(14)#2 | 24.06(11)  |
| C(15)-K(2)-C(14)#2   | 155.94(11) |
| C(17)#2-K(2)-C(14)#2 | 49.60(10)  |
| C(17)-K(2)-C(14)#2   | 130.40(10) |
| C(16)#2-K(2)-C(14)   | 137.47(11) |
| C(16)-K(2)-C(14)     | 42.53(11)  |
| P(1)#2-K(2)-C(14)    | 93.84(10)  |
| P(1)-K(2)-C(14)      | 86.16(10)  |
| C(15)#2-K(2)-C(14)   | 155.94(11) |
| C(15)-K(2)-C(14)     | 24.06(11)  |
| C(17)#2-K(2)-C(14)   | 130.40(10) |
| C(17)-K(2)-C(14)     | 49.60(10)  |
| C(14)#2-K(2)-C(14)   | 180.00(14) |
| C(16)#2-K(2)-C(9)#2  | 43.10(10)  |
| C(16)-K(2)-C(9)#2    | 136.90(10) |
| P(1)#2-K(2)-C(9)#2   | 54.36(7)   |
| P(1)-K(2)-C(9)#2     | 125.64(7)  |
| C(15)#2-K(2)-C(9)#2  | 50.22(11)  |
| C(15)-K(2)-C(9)#2    | 129.78(11) |
| C(17)#2-K(2)-C(9)#2  | 24.20(9)   |
| C(17)-K(2)-C(9)#2    | 155.80(9)  |
| C(14)#2-K(2)-C(9)#2  | 42.25(10)  |
| C(14)-K(2)-C(9)#2    | 137.75(10) |

|                   |            |
|-------------------|------------|
| C(16)#2-K(2)-C(9) | 136.90(10) |
| C(16)-K(2)-C(9)   | 43.10(10)  |
| P(1)#2-K(2)-C(9)  | 125.64(7)  |
| P(1)-K(2)-C(9)    | 54.36(7)   |
| C(15)#2-K(2)-C(9) | 129.78(11) |
| C(15)-K(2)-C(9)   | 50.22(11)  |
| C(17)#2-K(2)-C(9) | 155.80(9)  |
| C(17)-K(2)-C(9)   | 24.20(9)   |
| C(14)#2-K(2)-C(9) | 137.75(10) |
| C(14)-K(2)-C(9)   | 42.25(10)  |
| C(9)#2-K(2)-C(9)  | 180.00(15) |
| C(1)-P(1)-C(21)   | 107.59(17) |
| C(1)-P(1)-K(2)    | 115.75(13) |
| C(21)-P(1)-K(2)   | 131.66(12) |
| C(36)-O(1)-C(33)  | 110.7(6)   |
| C(36)-O(1)-K(1)   | 116.5(6)   |
| C(33)-O(1)-K(1)   | 132.0(5)   |
| C(40)-O(2)-C(37)  | 99.5(11)   |
| C(1)-N(1)-C(9)    | 119.5(3)   |
| C(1)-N(1)-K(1)    | 109.8(2)   |
| C(9)-N(1)-K(1)    | 124.7(2)   |
| N(1)-C(1)-C(2)    | 112.4(3)   |
| N(1)-C(1)-P(1)    | 123.2(3)   |
| C(2)-C(1)-P(1)    | 124.4(3)   |
| N(1)-C(1)-K(1)    | 49.51(19)  |
| C(2)-C(1)-K(1)    | 68.61(18)  |
| P(1)-C(1)-K(1)    | 155.35(17) |
| C(8)-C(2)-C(3)    | 117.2(4)   |
| C(8)-C(2)-C(1)    | 123.0(3)   |
| C(3)-C(2)-C(1)    | 119.7(3)   |
| C(8)-C(2)-K(1)    | 110.8(2)   |
| C(3)-C(2)-K(1)    | 72.3(2)    |
| C(1)-C(2)-K(1)    | 86.2(2)    |
| C(4)-C(3)-C(2)    | 121.3(4)   |
| C(4)-C(3)-K(1)    | 106.0(3)   |
| C(2)-C(3)-K(1)    | 82.7(2)    |
| C(5)-C(4)-C(3)    | 121.0(4)   |
| C(4)-C(5)-C(7)    | 118.1(4)   |
| C(4)-C(5)-C(6)    | 121.5(5)   |
| C(7)-C(5)-C(6)    | 120.3(5)   |
| C(5)-C(7)-C(8)    | 121.2(4)   |
| C(2)-C(8)-C(7)    | 121.1(4)   |
| C(17)-C(9)-C(10)  | 119.4(4)   |

|                   |          |
|-------------------|----------|
| C(17)-C(9)-N(1)   | 119.9(3) |
| C(10)-C(9)-N(1)   | 120.3(4) |
| C(17)-C(9)-K(2)   | 73.1(2)  |
| C(10)-C(9)-K(2)   | 80.3(2)  |
| N(1)-C(9)-K(2)    | 122.8(2) |
| C(14)-C(10)-C(9)  | 118.4(4) |
| C(14)-C(10)-C(11) | 120.4(4) |
| C(9)-C(10)-C(11)  | 121.2(4) |
| C(14)-C(10)-K(2)  | 74.9(3)  |
| C(9)-C(10)-K(2)   | 75.6(2)  |
| C(11)-C(10)-K(2)  | 122.5(3) |
| C(10)-C(11)-C(12) | 112.5(5) |
| C(10)-C(11)-C(13) | 110.3(4) |
| C(12)-C(11)-C(13) | 110.3(4) |
| C(15)-C(14)-C(10) | 121.9(4) |
| C(15)-C(14)-K(2)  | 73.0(3)  |
| C(10)-C(14)-K(2)  | 81.4(3)  |
| C(16)-C(15)-C(14) | 119.0(4) |
| C(16)-C(15)-K(2)  | 75.2(2)  |
| C(14)-C(15)-K(2)  | 83.0(3)  |
| C(15)-C(16)-C(17) | 121.5(4) |
| C(15)-C(16)-K(2)  | 80.0(2)  |
| C(17)-C(16)-K(2)  | 80.8(2)  |
| C(16)-C(17)-C(9)  | 119.8(4) |
| C(16)-C(17)-C(18) | 119.5(4) |
| C(9)-C(17)-C(18)  | 120.8(4) |
| C(16)-C(17)-K(2)  | 74.2(2)  |
| C(9)-C(17)-K(2)   | 82.7(2)  |
| C(18)-C(17)-K(2)  | 112.8(2) |
| C(17)-C(18)-C(20) | 113.7(4) |
| C(17)-C(18)-C(19) | 111.0(3) |
| C(20)-C(18)-C(19) | 109.7(4) |
| C(22)-C(21)-C(29) | 118.1(4) |
| C(22)-C(21)-P(1)  | 123.3(3) |
| C(29)-C(21)-P(1)  | 118.5(3) |
| C(26)-C(22)-C(21) | 120.0(4) |
| C(26)-C(22)-C(23) | 118.5(4) |
| C(21)-C(22)-C(23) | 121.5(4) |
| C(22)-C(23)-C(24) | 111.6(4) |
| C(22)-C(23)-C(25) | 113.1(4) |
| C(24)-C(23)-C(25) | 110.1(4) |
| C(27)-C(26)-C(22) | 121.2(5) |
| C(26)-C(27)-C(28) | 119.9(4) |

|                   |          |
|-------------------|----------|
| C(27)-C(28)-C(29) | 121.2(5) |
| C(28)-C(29)-C(21) | 119.6(4) |
| C(28)-C(29)-C(30) | 118.3(4) |
| C(21)-C(29)-C(30) | 122.1(4) |
| C(31)-C(30)-C(32) | 110.6(4) |
| C(31)-C(30)-C(29) | 111.1(4) |
| C(32)-C(30)-C(29) | 114.3(5) |
| O(1)-C(33)-C(34)  | 104.5(7) |
| C(35)-C(34)-C(33) | 105.4(6) |
| C(34)-C(35)-C(36) | 107.1(8) |
| O(1)-C(36)-C(35)  | 107.0(8) |
| C(38)-C(37)-O(2)  | 81.8(9)  |
| C(39)-C(38)-C(37) | 81(2)    |
| C(38)-C(39)-C(40) | 71.7(16) |
| O(2)-C(40)-C(39)  | 82.5(13) |

---

Symmetry transformations used to generate equivalent atoms:

#1  $-x, y, -z+1/2$     #2  $-x, -y+1, -z$

**Table S19 Anisotropic displacement parameters ( $\text{\AA}^2 \times 10^3$ ) for  $[\{\text{K}(\text{THF})\}_n]_n \cdot n\text{THF}$  4. The anisotropic displacement factor exponent takes the form:  $-2 \pi^2 [h^2 a^*{}^2 U_{11} + \dots + 2 h k a^* b^* U_{12}]$**

|       | U11     | U22     | U33     | U23    | U13     | U12    |
|-------|---------|---------|---------|--------|---------|--------|
| K(1)  | 72(1)   | 47(1)   | 102(1)  | 0      | 65(1)   | 0      |
| K(2)  | 56(1)   | 123(1)  | 58(1)   | -13(1) | 40(1)   | -15(1) |
| P(1)  | 43(1)   | 68(1)   | 53(1)   | 7(1)   | 33(1)   | -1(1)  |
| O(1)  | 178(5)  | 74(3)   | 356(9)  | -8(4)  | 221(6)  | -14(3) |
| O(2)  | 550(20) | 289(14) | 453(19) | 98(13) | 422(19) | 33(14) |
| N(1)  | 36(2)   | 42(2)   | 51(2)   | 5(2)   | 27(2)   | -3(2)  |
| C(1)  | 36(2)   | 33(2)   | 51(3)   | 10(2)  | 26(2)   | 3(2)   |
| C(2)  | 37(2)   | 39(2)   | 59(3)   | 1(2)   | 32(2)   | 2(2)   |
| C(3)  | 39(2)   | 58(3)   | 53(3)   | -2(2)  | 28(2)   | -6(2)  |
| C(4)  | 51(3)   | 92(4)   | 59(3)   | -6(3)  | 36(3)   | -3(3)  |
| C(5)  | 36(3)   | 98(4)   | 68(3)   | -23(3) | 31(3)   | -8(3)  |
| C(6)  | 63(4)   | 168(6)  | 71(4)   | -54(4) | 34(3)   | -27(4) |
| C(7)  | 45(3)   | 75(3)   | 87(4)   | -29(3) | 41(3)   | -20(2) |
| C(8)  | 56(3)   | 55(3)   | 85(4)   | -13(3) | 53(3)   | -10(2) |
| C(9)  | 31(2)   | 55(3)   | 50(3)   | 11(2)  | 28(2)   | 3(2)   |
| C(10) | 44(3)   | 69(3)   | 59(3)   | 24(3)  | 31(3)   | 4(2)   |
| C(11) | 63(3)   | 68(4)   | 94(4)   | 36(3)  | 45(3)   | 9(3)   |
| C(12) | 103(5)  | 114(5)  | 143(5)  | 68(4)  | 83(4)   | 6(4)   |
| C(13) | 99(5)   | 69(4)   | 143(5)  | 43(4)  | 74(4)   | 21(3)  |
| C(14) | 50(3)   | 95(4)   | 64(3)   | 34(3)  | 32(3)   | 8(3)   |
| C(15) | 43(3)   | 117(5)  | 43(3)   | 13(3)  | 21(2)   | -7(3)  |
| C(16) | 48(3)   | 79(3)   | 47(3)   | -4(2)  | 28(3)   | -18(2) |
| C(17) | 41(2)   | 56(3)   | 43(2)   | 3(2)   | 27(2)   | -6(2)  |
| C(18) | 65(3)   | 50(3)   | 50(3)   | 4(2)   | 33(3)   | -9(2)  |
| C(19) | 97(4)   | 97(4)   | 120(5)  | 47(4)  | 71(4)   | 29(4)  |
| C(20) | 89(4)   | 77(4)   | 74(3)   | 3(3)   | 56(3)   | -24(3) |
| C(21) | 49(3)   | 57(3)   | 56(3)   | 3(2)   | 40(2)   | 1(2)   |
| C(22) | 47(3)   | 70(3)   | 51(3)   | 8(2)   | 34(2)   | 11(2)  |
| C(23) | 58(3)   | 72(3)   | 63(3)   | 16(3)  | 38(3)   | 10(2)  |
| C(24) | 132(5)  | 89(4)   | 81(4)   | -5(3)  | 69(4)   | -14(4) |
| C(25) | 123(5)  | 109(5)  | 87(4)   | 22(3)  | 78(4)   | 21(4)  |
| C(26) | 52(3)   | 102(4)  | 64(3)   | 12(3)  | 38(3)   | 15(3)  |
| C(27) | 47(3)   | 126(5)  | 92(4)   | 10(4)  | 48(3)   | 0(3)   |
| C(28) | 59(4)   | 88(4)   | 96(4)   | 8(3)   | 57(3)   | -6(3)  |
| C(29) | 47(3)   | 74(3)   | 75(3)   | 8(3)   | 43(3)   | 0(2)   |

|       |         |         |         |          |         |         |
|-------|---------|---------|---------|----------|---------|---------|
| C(30) | 61(3)   | 80(4)   | 91(4)   | 17(3)    | 47(3)   | -10(3)  |
| C(31) | 170(7)  | 107(5)  | 96(5)   | 30(4)    | 77(5)   | 25(5)   |
| C(32) | 118(5)  | 79(4)   | 158(6)  | 8(4)     | 92(5)   | -7(4)   |
| C(33) | 127(7)  | 104(6)  | 257(10) | -1(6)    | 132(7)  | -18(5)  |
| C(34) | 161(7)  | 80(5)   | 289(11) | -29(6)   | 178(8)  | -31(5)  |
| C(35) | 156(7)  | 113(6)  | 273(11) | -20(6)   | 166(8)  | -4(5)   |
| C(36) | 401(18) | 115(8)  | 460(20) | -102(10) | 384(18) | -91(10) |
| C(37) | 238(16) | 158(12) | 470(30) | -149(16) | 157(19) | -64(11) |
| C(38) | 390(30) | 580(40) | 105(9)  | 70(16)   | 153(14) | 100(30) |
| C(39) | 188(15) | 570(40) | 560(40) | 130(30)  | 290(20) | 50(20)  |
| C(40) | 286(17) | 153(11) | 195(12) | -22(8)   | 119(12) | -60(11) |

---



**Table S20. Hydrogen coordinates (  $\times 10^4$ ) and isotropic displacement parameters ( $\text{\AA}^2 \times 10^3$ ) for  $[\{\text{K}(\text{THF})\}_n]\text{nTHF 4}$ .**

|        | x     | y    | z    | U(eq) |
|--------|-------|------|------|-------|
| H(3)   | 691   | 5929 | 3118 | 63    |
| H(4)   | 1231  | 6396 | 4353 | 81    |
| H(6A)  | 1889  | 7456 | 5375 | 163   |
| H(6B)  | 1931  | 8643 | 5160 | 163   |
| H(6C)  | 2310  | 7722 | 5345 | 163   |
| H(7)   | 1897  | 8565 | 4011 | 85    |
| H(8)   | 1372  | 8069 | 2777 | 72    |
| H(11)  | 6     | 8188 | 1051 | 97    |
| H(12A) | 33    | 8102 | 111  | 178   |
| H(12B) | -142  | 9288 | 115  | 178   |
| H(12C) | -537  | 8427 | -487 | 178   |
| H(13A) | -1007 | 8865 | -51  | 163   |
| H(13B) | -568  | 9594 | 614  | 163   |
| H(13C) | -760  | 8574 | 768  | 163   |
| H(14)  | -1043 | 7088 | -703 | 89    |
| H(15)  | -1325 | 5311 | -929 | 88    |
| H(16)  | -940  | 4099 | 43   | 73    |
| H(18)  | 13    | 4724 | 1941 | 71    |
| H(19A) | 23    | 3143 | 1091 | 158   |
| H(19B) | 382   | 3156 | 1963 | 158   |
| H(19C) | 430   | 4072 | 1550 | 158   |
| H(20A) | -793  | 4034 | 1356 | 117   |
| H(20B) | -370  | 3149 | 1859 | 117   |
| H(20C) | -709  | 3106 | 991  | 117   |
| H(23)  | 1269  | 4907 | 2514 | 79    |
| H(24A) | 1463  | 3818 | 1950 | 152   |
| H(24B) | 1548  | 3146 | 2586 | 152   |
| H(24C) | 2010  | 3633 | 2713 | 152   |
| H(25A) | 2253  | 4545 | 3872 | 149   |
| H(25B) | 1765  | 4050 | 3665 | 149   |
| H(25C) | 1860  | 5325 | 3776 | 149   |
| H(26)  | 2530  | 5364 | 3357 | 88    |
| H(27)  | 2828  | 6837 | 3160 | 104   |
| H(28)  | 2288  | 8158 | 2315 | 92    |
| H(30)  | 1008  | 8361 | 1371 | 96    |

|        |      |       |      |     |
|--------|------|-------|------|-----|
| H(31A) | 1457 | 8245  | 756  | 198 |
| H(31B) | 928  | 8766  | 366  | 198 |
| H(31C) | 1011 | 7495  | 521  | 198 |
| H(32A) | 1636 | 9612  | 2215 | 176 |
| H(32B) | 1284 | 10056 | 1394 | 176 |
| H(32C) | 1820 | 9599  | 1771 | 176 |
| H(33A) | 297  | 10641 | 1678 | 190 |
| H(33B) | 620  | 9569  | 1886 | 190 |
| H(34A) | 1329 | 10402 | 2775 | 184 |
| H(34B) | 1025 | 11476 | 2323 | 184 |
| H(35A) | 947  | 11957 | 3104 | 194 |
| H(35B) | 1405 | 11158 | 3655 | 194 |
| H(36A) | 938  | 10011 | 3626 | 299 |
| H(36B) | 507  | 10902 | 3187 | 299 |
| H(37A) | 3160 | 12095 | 4766 | 422 |
| H(37B) | 2577 | 12366 | 4318 | 422 |
| H(38A) | 2913 | 10062 | 4637 | 441 |
| H(38B) | 2836 | 10682 | 5152 | 441 |
| H(39A) | 2257 | 11586 | 3968 | 491 |
| H(39B) | 2094 | 10502 | 4164 | 491 |
| H(40A) | 2872 | 9697  | 4333 | 291 |
| H(40B) | 2332 | 9624  | 3503 | 291 |

---

**END**
